## Amplified cortical neural responses as animals learn to use novel activity patterns

Bradley Akitake<sup>\*1</sup>, Hannah M. Douglas<sup>\*1</sup>, Paul K. LaFosse<sup>1</sup>, Manuel Beiran<sup>2</sup>, Ciana E. Deveau<sup>1</sup>, Jonathan O'Rawe<sup>1</sup>, Anna J. Li<sup>1</sup>, Lauren N. Ryan<sup>1</sup>, Samuel P. Duffy<sup>1</sup>, Zhishang Zhou<sup>1</sup>, Yanting Deng<sup>1</sup>, Kanaka Rajan<sup>2</sup>, and Mark H. Histed<sup>\*\*1</sup>.

\* denotes equal contribution

<sup>1</sup> Unit on Neural Computation and Behavior, National Institute of Mental Health Intramural Program, National Institutes of Health, Bethesda, MD, 20892, USA

<sup>2</sup> Icahn School of Medicine at Mount Sinai, New York, NY, 10029, USA

\*\* Correspondence: [mark.histed@nih.gov](mailto:mark.histed@nih.gov)

### 1 Summary

2 Cerebral cortex supports representations of the world in patterns of neural activity, used by the  
3 brain to make decisions and guide behavior. Past work has found diverse, or limited, changes in  
4 the primary sensory cortex in response to learning, suggesting the key computations might  
5 occur in downstream regions. Alternatively, sensory cortical changes may be central to learning.  
6 We studied cortical learning by using controlled inputs we insert: we trained mice to recognize  
7 entirely novel, non-sensory patterns of cortical activity in the primary visual cortex (V1) created  
8 by optogenetic stimulation. As animals learned to use these novel patterns, we found their  
9 detection abilities improved by an order of magnitude or more. The behavioral change was  
10 accompanied by large increases in V1 neural responses to fixed optogenetic input. Neural  
11 response amplification to novel optogenetic inputs had little effect on existing visual sensory  
12 responses. A recurrent cortical model shows that this amplification can be achieved by a small  
13 mean shift in recurrent network synaptic strength. Amplification would seem to be desirable to  
14 improve decision-making in a detection task, and therefore these results suggest that adult  
15 recurrent cortical plasticity plays a significant role in improving behavioral performance during  
16 learning.

17

## 18 Introduction

19 Sensorimotor decision-making involves patterns of neural activity which propagate through the  
20 neural circuits of many brain areas and are changed by those circuits. The sets of neural  
21 computations involved in sensory decision-making have not been fully determined<sup>1-4</sup>, but some  
22 principles have been identified. One basic neural computation is representation, storing  
23 information about the sensory world in patterns of activity, as is observed in many cerebral  
24 cortical areas. Another is decision, or readout, in which representations are transformed or  
25 categorized by circuits into forms suitable for action<sup>5,6</sup>.

26 There is substantial evidence that sensory cortical representations can be modified by activity<sup>7-</sup>  
27 <sup>11</sup>, but it is less clear whether cortical response changes constitute the computational change  
28 that leads to improved behavior with learning. Studies in humans and animals have reported  
29 varied effects of learning on visual cortical responses, including increased activity after visual  
30 training<sup>12-15</sup>, selective suppression of activity<sup>16</sup>, decreased variability of visual selectivity  
31 response properties after training<sup>17-19</sup>, and activity changes that disappeared once early learning  
32 has ended<sup>20</sup>. Some learning studies have found improvement in primary sensory  
33 representations<sup>19,21-23</sup>, along with changes in anticipatory and other signals<sup>18,24</sup>. Other studies in  
34 primary visual cortex (area V1) have found little task-relevant change<sup>16,25</sup>, but found changes in  
35 higher visual areas like V4<sup>26,27</sup>. Thus, it has been unclear whether a major substrate of visual  
36 sensory learning is representational improvement in V1, such as increased gain or selectivity, or  
37 whether the principal changes are readout changes, perhaps in downstream areas.

38 One reason it has been difficult to delineate the neural computations underlying sensory  
39 decisions is that neurons and brain areas are highly interconnected, and sensory stimuli change  
40 activity in many brain areas<sup>28-30</sup>. Thus, changes in neural activity that are observed in one  
41 cortical area may be inherited from input regions, and indeed cognitive factors like attention or  
42 arousal can modulate visual activity before it arrives at the cortex<sup>31</sup>. One way to isolate cortical  
43 representations from downstream readout computations is to use stimulation-based behavioral  
44 paradigms. Using electrical or optogenetic stimulation methods, entirely novel (non-sensory, or  
45 'off-manifold')<sup>32,33</sup>, activity patterns can be introduced in a chosen brain region. Using such novel  
46 patterns is a way to explore the limits of cortical plasticity, as they are dissimilar from normal  
47 sensory patterns.

48 Here, to isolate representational changes that occur as animals improve on a task, we study V1  
49 neural changes as mice learn to use a new cortical representation induced with optogenetic  
50 stimulation. Animals show dramatic improvements in behavior as they learn, with detection  
51 thresholds improving at times over several orders of magnitude during weeks or months of  
52 learning. Alongside the behavioral improvements, cortical neurons produce larger responses to  
53 the same optogenetic input. Thus, learning enables a fixed input to produce an increasingly  
54 large response in the V1 network, presumably by some adjustment of local, recurrent circuitry<sup>34-</sup>  
55 <sup>36</sup>. The results imply that this learning leads to local changes in representations by increasing  
56 recurrent amplification in V1.

57

58

## 59 Results

60 We trained animals to detect neural activity evoked by optogenetic stimulation, and measured  
 61 cortical responses during learning with 2-photon imaging. We implanted a 3 mm optical glass  
 62 window over V1 and used multiple viral injections in layer II/III to express an opsin (soma-  
 63 targeted ChrimsonR; stChrimsonR; excitatory neurons, AAV9-FLIP/DIO in Emx1-Cre mouse  
 64 line)<sup>37,38,39</sup>, and for 2-photon imaging, a calcium indicator (jRCaMP7s or 8s; all neurons; AAV9-  
 65 hSyn)<sup>40-42</sup>.

66 We delivered optogenetic stimulation light through the objective (combined into the light path via  
 67 a dichroic; Methods; Figure 1A) which robustly activates stChrimsonR-expressing neurons  
 68 throughout layer II/III (~500  $\mu$ m diameter light spot at cortical surface; Figure S5 and  
 69 Methods,<sup>43</sup>).

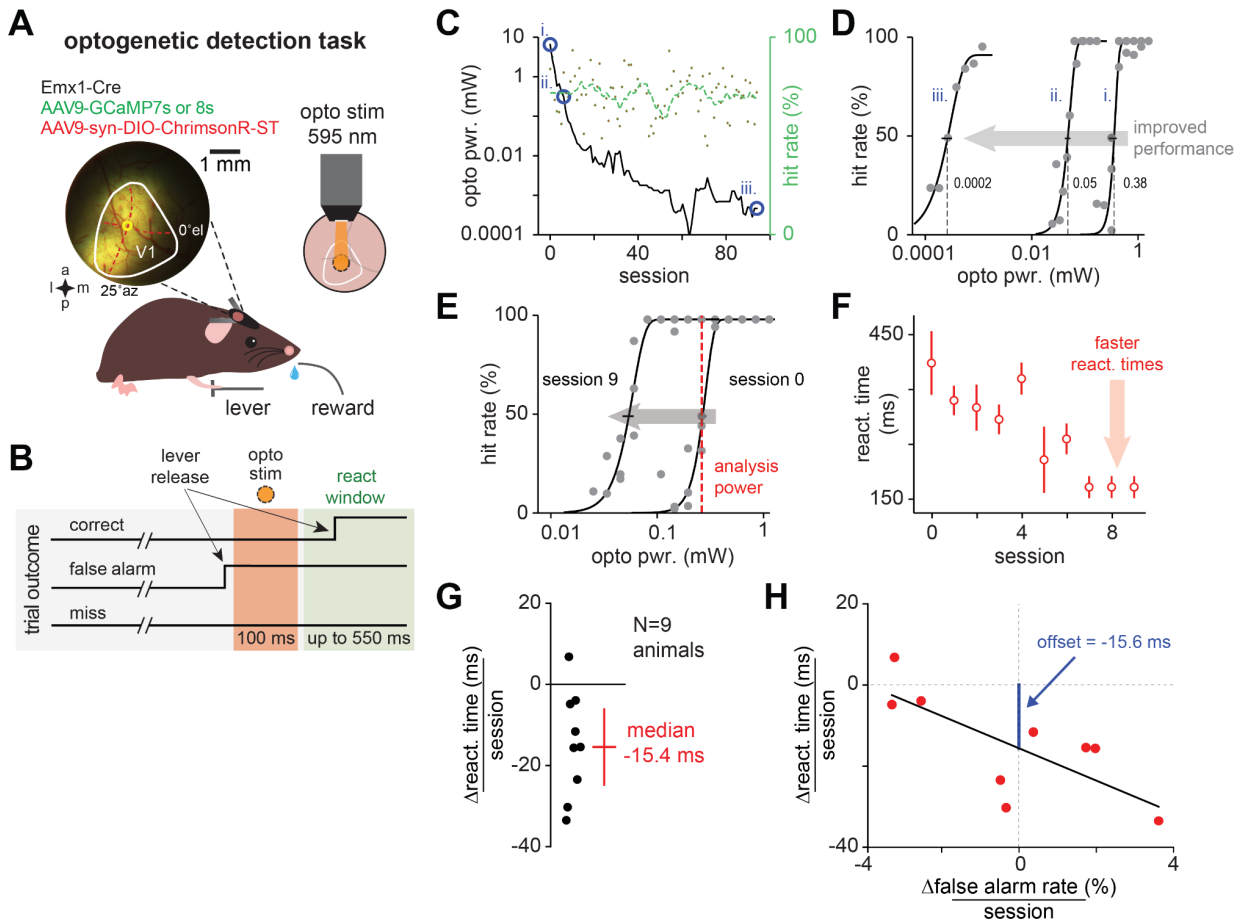

70

71 **Figure 1 - Mice gradually learn to report direct optogenetic stimulation of V1 excitatory neurons. (A, B)** Task  
72 schematic. Animals release a lever when they detect the optogenetic stimulus (opsin: soma-targeted stChrimsonR in  
73 excitatory neurons). Only rapid lever releases (between 50-550 ms post-stim) were scored as correct (release before  
74 this window: false alarm, releases later: miss). **(C)** Example of long-term optogenetic learning. Blue circles, i-ii (7  
75 sessions): initial fast drop in stimulation power required to hold performance constant (green: hit rate roughly  
76 constant, >70%; Results), ii-iii: longer phase of behavioral improvement (80 sessions). **(D)** Psychometric curves  
77 showing stimulation power decrease (curves from days shown by i, ii, and iii in **1C**. Small gray text, threshold power  
78 in mW. Leftward shift signifies improved performance: gray arrow). Power threshold of the final session was three  
79 orders of magnitude lower than threshold of first session (0.38, 0.0002 mW: i, iii). **(E)** Psychometric curves covering  
80 the initial phase of optogenetic learning (same animal from **C,D**, sessions 0 and 9). Red dotted line: common power  
81 across sessions used for reaction time analysis. **(F, G)** Reaction times in response to optogenetic stimulation get  
82 shorter with learning (first 10 sessions of optogenetic learning, **F**: N = 1 animal, errorbars: SEM over trials, **G**: N = 9  
83 animals, each point: regression slope for one animal, power shown by red line in **E**, Methods; errorbar: IQR = 18.6, p  
84 < 0.01). **(H)** Change in reaction time cannot merely be explained by change in false alarm rate, a proxy for response  
85 criterion<sup>44</sup> (black line: linear regression, slope -3.98, p = 0.002, blue line: negative change in reaction time even at  
86 zero false alarm rate change, offset -15.6, p = 0.02.) Here and below, all errorbars: SEM unless otherwise specified.

87 Optogenetic detection training (N = 16 animals) occurred in two phases (Figure S1A,B). First,  
88 we trained animals to perform a sensory detection task. This was so they first learned the task  
89 demands (waiting for stimulus, lever press, etc.), reducing behavioral changes due to those  
90 effects as optogenetic learning progressed. We trained animals to respond to a small visual  
91 stimulus (monocular Gabor; 14° FWHM) until they performed the task with a stable  
92 psychometric threshold for three sessions (e.g., for animals imaged during behavior: training  
93 time 15-29 days, 23.6 ± 6.2 days, mean ± SEM, N = 3 animals). Next, we added an optogenetic  
94 stimulus (Figure 1; Figure S1; 0.5 mW at 595 nm), delivered at the same time as the visual  
95 stimulus. Over the course of several sessions, we removed the visual stimulus gradually by  
96 manually reducing visual stimulus contrast<sup>45</sup>. This made it more difficult to perform the task  
97 using the visual stimulus, but kept performance at approximately the same level as animals  
98 began to rely on the optogenetic stimulus (Figure 1A,B; Figure S1A,B). When contrast of the  
99 visual stimulus was zero, animals relied entirely on the optogenetic stimulus (2.3 ± 0.9 days  
100 after first optogenetic stimulus, mean ± SEM, animals used for imaging, N = 3; “session 0”). We  
101 confirmed that animals responded only to the optogenetic-evoked neural activity by moving the  
102 optogenetic spot during behavior to non-training locations within V1, which resulted in no  
103 behavioral responses (Figure S2A,B).

104 How similar are optogenetic responses to visual sensory responses? The optogenetic stimuli we  
105 use produce a different pattern of responses across the neural population than visual inputs,  
106 which activate cells based on their receptive field properties. However, in the temporal domain  
107 our optogenetic stimulation is more similar to visual responses, as optogenetic stimulation with  
108 the parameters we use modulates firing rates (measured with electrophysiology in<sup>46</sup>), and does  
109 not dramatically synchronize firing. This is consistent with the cortex operating as a recurrent  
110 network with reasonable strong excitatory-inhibitory coupling. In such a network, cortical  
111 neurons can fire irregularly, due to large amounts of recurrent input that lead to highly  
112 fluctuating membrane potentials<sup>47-49</sup>. Inputs then modulate the firing rate<sup>43,50,51</sup> of the neurons  
113 — whose individual spike times are determined by the network-driven membrane potential  
114 fluctuations<sup>52</sup>.

## 115 **Optogenetic learning in a detection task**

116 We found that animals dramatically increase their ability to detect the optogenetic stimulus –  
117 that is, the activation of V1 neurons — with practice. We collected psychometric curves during  
118 training sessions to track changes in animals' perceptual sensitivity to the optogenetic stimulus  
119 (Figure 1C). Over the course of long-term training (~90 sessions), we found that with practice  
120 animals' perceptual thresholds dropped dramatically (Figure 1C). That is, animals needed less-  
121 strong stimulation over time to achieve the same level of performance. The observed rate of  
122 threshold change could be roughly separated into two phases, a phase that occurred within the  
123 initial ~10 sessions of training after acquisition of the optogenetic task (Figure 1C,D: i and ii) and  
124 a slower phase over many additional sessions (Figure 1C,D: ii and iii). Below, we focus on the  
125 first six days of this initial learning phase for our experiments examining neural activity changes.  
126 In this initial phase, the threshold changes were large (Figure 1E,  $\Delta$ thresh. pwr. = -0.28 mW:  
127 0.35, 95% CI [0.31-0.37], to 0.058 [0.052 - 0.063]).

128 The threshold changes were accompanied by decreases in reaction times. We compared  
129 reaction times for fixed stimulation powers across days (Figure 1F,G, median = -15.4 ms, IQR =  
130 18.6,  $p < 0.01$ , over a subset of animals,  $N = 9$ , with common stimulation powers). The reaction  
131 time changes could not be accounted for by changes in animals' false alarm rates (Figure 1H).  
132 While reaction times did change with false alarm rates, as expected due to changes in  
133 underlying perceptual criterion, reaction time changes remained after regressing out false alarm  
134 rate (Figure 1H).

## 135 **Responses of V1 to optogenetic stimulation are amplified by learning**

136 We next imaged neural responses to stimulation during the process of learning. We measured  
137 neural responses in layer II/III during the first six optogenetic learning sessions, where learning  
138 is rapid (Figure 1C-F; Figure 2A). During this period, animals' showed a greater than 50% drop  
139 in their optogenetic detection thresholds (Figure 2A,  $\Delta$ thresh. pwr. from session 0 to 5,  $-62 \pm$   
140 10%,  $N = 4$  animals, different cohort than in Figure 1).

141 To examine response changes with high signal-to-noise, we first averaged fluorescence  
142 responses over a large region of interest (Figure 2C). Imaging (Figure 2B) during optogenetic  
143 detection behavior then revealed clear stimulus-evoked responses that were strongly amplified  
144 over the course of training (Figure 2C-J).

145 This amplification could not be explained by shifts in the imaging plane or by changes in virus  
146 expression over sessions (Figure S3). It also could not be explained by tissue growth under the  
147 window or other optical degradation, over time or as a result of stimulation, as the effect we  
148 measured was in the opposite direction: an increase in responses to stimulation. However, to  
149 verify that optical changes did not account for the effects, we measured the effects of  
150 stimulation within each preparation at the imaging plane while not imaging, and used it to adjust  
151 stimulation power, finding that the amplification effects remained with and without this  
152 adjustment (Figure S4). Finally, as another check to rule out effects of imaging properties or  
153 expression contributing to this effect, we stimulated in control animals using matched mock  
154 training sessions, with the same imaging, stimulation, reward, optical window, and injection

155 parameters as during training (Figure 2I,J; see also Figure S9 for similar control experiments  
 156 using even higher powers). We found no amplification in this closely matched control (Figure  
 157 2I,J), arguing that the amplification we saw was indeed an increase in neural responses as a  
 158 function of learning.

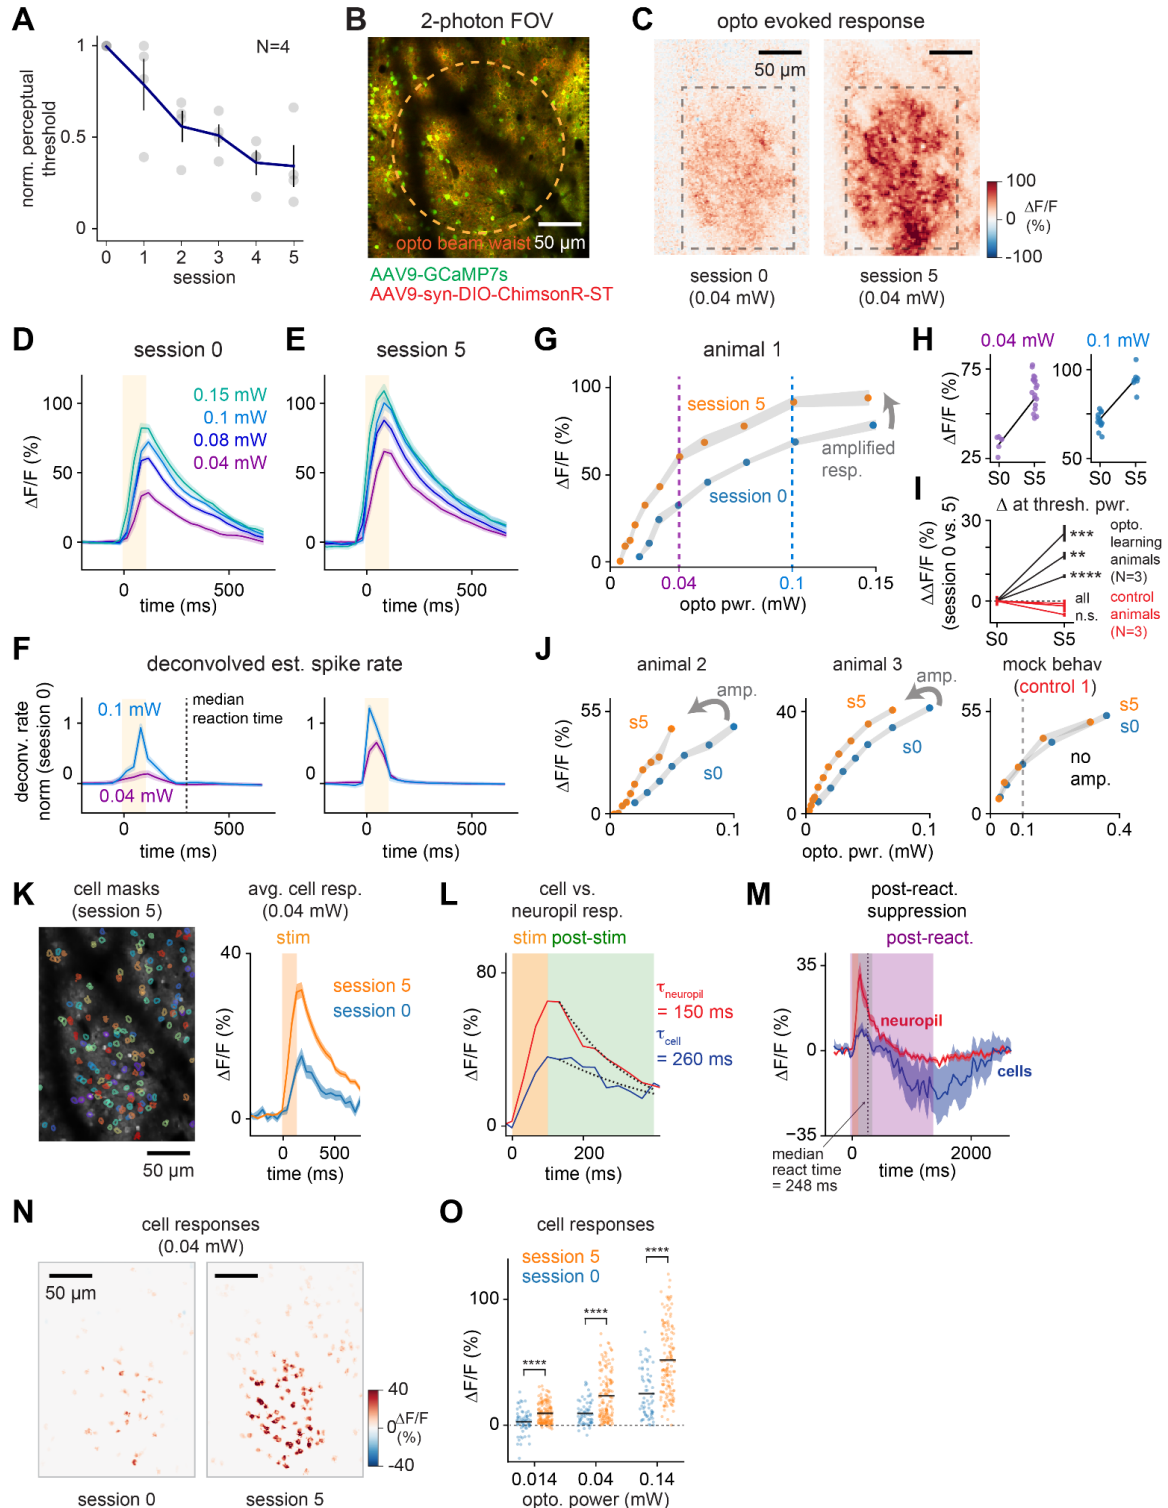

159

160 **Figure 2 - V1 responses to optogenetic stimulation are amplified by learning.** (A) Animals improve optogenetic  
161 detection ability with practice (y-axis: threshold, stimulation power required for fixed detection performance;  
162 normalized to session 0, N = 4 animals imaged during learning, different cohort than Figure 1). (B) stChrimsonR,  
163 GCaMP7s expressed in layer II/III neurons (animal 1, shown over days in Figure S3). Orange circle: approx.  
164 stimulation beam waist (~200  $\mu\text{m}$ , Figure S5). (C) Neural response amplification after optogenetic learning (mean  
165  $\Delta\text{F}/\text{F}$ , 0.04 mW stimulation power, near psychometric threshold, animal 1, analysis from same animal for panels D-H).  
166 Grey box: region of interest (ROI) used for trial-by-trial  $\Delta\text{F}/\text{F}$  analysis. (D, E)  $\Delta\text{F}/\text{F}$  time courses before and after  
167 learning, matched stimulation powers. (F) Deconvolved signal (spike rate proxy; OASIS<sup>53,54</sup>) shows spiking changes  
168 occur during stimulation (decay in D-E due to calcium dynamics, not spiking). (G) Average  $\Delta\text{F}/\text{F}$  response across  
169 power levels (ROI shown in C). (H) Trial  $\Delta\text{F}/\text{F}$  responses before and after learning (session 0 and 5: S0 and S5,  $\Delta\text{F}/\text{F}$   
170 in ROI, C; left: power near detection threshold, right: above threshold; each point one trial). (I) Normalized response  
171 change, all animals, with learning or control (change in  $\Delta\text{F}/\text{F}$ , mean over trials  $\pm$  SEM, at threshold power, \*\*  $p < 10^{-2}$ ,  
172 \*\*\*  $p < 10^{-3}$ , \*\*\*\*  $p < 10^{-4}$ , Mann-Whitney U test). (J) Same as G, for two additional animals plus an example control  
173 animal. (K) Left: cell masks (animal 2, session 5; found with suite2p<sup>55</sup>). Right: Mean cell responses before and after  
174 optogenetic learning. Orange box: optogenetic stim period (100 ms). (L) Example cell stimulation response (0.14  
175 mW; more timecourses in Figure S6). Dotted lines: single-exponential fits to fluorescence decay (100-350 ms, green  
176 box). (M) Mean stimulation response in cells and neuropil is positive (left), but suppression is seen after animals'  
177 responses (lever releases: dashed black line), purple: post-reaction averaging window. (N) Neuron responses to  
178 stimulation (during stimulation period: yellow in L,M) before and after learning (animal 2, near-threshold power for  
179 session 5, 0.04 mW). (O) Cell responses show widespread amplification with learning (each point: one cell, \*\*\*\*  $p <$   
180  $10^{-4}$ , unpaired t-test, session 0: N = 64, session 5: N = 142). N = 1 example animal in panels K-O.

181 In principle it could have been that amplification was seen at some power levels but not others.  
182 We examined optogenetic-evoked responses and found that after learning, responses were  
183 amplified at all optogenetic power levels (Figure 2G-J), with strong effects both near the  
184 psychometric threshold (where behavior is tightly bound to stimulus perception) and also at  
185 above-threshold optogenetic stimulation powers (where trials are perceptually easy and  
186 performance is not stimulus-limited), where animals perform well. Though the magnitude of  
187 these changes varied somewhat across animals, we measured individually significant  
188 amplification in all learning animals and not in controls (Figure 2I; Figure S8).

189 We then examined single-neuron responses in an example animal (Figure 2K). We found that  
190 during the stimulation period, nearly all individual neurons (Figure 2K,N,O) as well as the  
191 surrounding neuropil (Figure 2L and Figure S6) showed positive responses. Thus, averaging  
192 neurons into large ROIs (Figure 2C-J) captures the effects seen in single cells, the positive  
193 responses across many neurons. The cell responses were amplified with learning (Figure 2O),  
194 and the amplification was seen across multiple powers (Figure 2N,O, mean change in  $\Delta\text{F}/\text{F}$  =  
195 6.7, 14.0, 26.6%; at 0.014, 0.04, and 0.14 mW; 95% CI [3.0 - 10], [9.5 - 19.5], [17.2 - 36.0]%),  
196 also consistent with the data from the large-ROI population measurements (Figure 2B-J). We  
197 also examined whether neurons showed any signs of suppression after stimulation<sup>45</sup>. We did  
198 find evidence for suppression (Figure 2M). However, this suppression was not part of the  
199 behavioral response or decision, as it occurred only after the animal made its behavioral  
200 response (Figure 2M and Figure S7, average reaction time for optogenetic learning animals  $225$   
201  $\pm 23$  ms, mean  $\pm$  SEM, N = 3). This suppression timecourse is consistent with  
202 electrophysiological measurements of V1 excitatory optogenetic responses<sup>46</sup>. Those  
203 measurements show an initial positive transient in almost all neurons, followed in some  
204 excitatory cells by a suppressed steady state, effects that can be explained by coupling within  
205 the cortical recurrent network. In any case, for our 100 ms optogenetic pulses, we found the

206 neural responses during the stimulation period were nearly entirely positive (Figure 2D-F,M-O),  
207 and further, these responses increased with learning.

208 The changes we observed in neural activity were smaller than the improvements seen in  
209 perception. Animals' perceptual detection performance improved, and thresholds decreased, by  
210 a factor of approximately 2.7x after 6 sessions (i.e., power threshold was  $37 \pm 11\%$  of session 0  
211 levels; Figure 2A). In contrast,  $\Delta F/F$  over the course of 6 sessions, measured at threshold  
212 stimulation power showed a 1.7x increase in  $\Delta F/F$  over the large ROIs: session 0,  $25.6 \pm 7.4\%$ ,  
213 mean  $\pm$  SEM across animals, session 5,  $42.9 \pm 10.9\%$ , Figure 2I; and a 2.1x increase in mean  
214 cell peak  $\Delta F/F$ , Figure 2O, 9.3% to 23.3%. Several caveats apply: the readout mechanism  
215 presumably sums across large numbers of neurons and thus may not be limited by the change  
216 in cortical responses we measure, and opsin saturation at high power may lead to greater  
217 changes in power than activity. However, the fact that behavior changes by a larger factor than  
218 cortical responses could potentially indicate that there is an improvement in the readout  
219 mechanism, occurring along with the amplification changes we see.

## 220 **The largest neural response changes happened from one day to the next, not within-** 221 **session**

222 While we observed significant increases in  $\Delta F/F$  responses across experimental days, we found  
223 no evidence of increases within-session. In fact, we found a small decrease in responses to  
224 stimulation over the course of each experimental day (Figure S8, average  $\Delta F/F$  change over  
225 100 trials:  $-1.2\% \Delta F/F$ , 95% CI  $[-0.9$  to  $1.6]\% \Delta F/F$ , coeff. less than zero at  $p < 10^{-13}$ , via linear  
226 regression over trials within day, estimated across animals and sessions,  $N = 3$ ; Methods).  
227 Thus, it appears that optogenetic learning-related changes do not happen within the behavioral  
228 day, i.e., from one trial to the next. Instead, these data support that the major changes to neural  
229 responses occur outside of training, and may be driven by consolidation: changes in the brain in  
230 the hours between the experimental sessions.

## 231 **No amplification occurs with stimulation outside of the behavioral learning context**

232 To determine if cortical amplification is dependent on learning, or might arise from repeated  
233 optogenetic stimulus alone, we performed a stimulation control in a mock behavioral context,  
234 and found no amplification (Figure 2I,J). That experiment was conducted with stimulation  
235 powers matched to those used during optogenetic learning (up to 0.5 mW,  $N = 3$  animals). To  
236 determine if we could drive changes using stronger optogenetic stimulation, we increased  
237 stimulation power levels up to twice that used for behavior. We provided repeated optogenetic  
238 stimulation using a range of powers up to 1 mW (100 ms stimulation with  $\sim 6$  s interpulse  
239 interval, 1200 and 1500 repetitions,  $N = 2$  animals, thus  $N = 5$  total non-behaving controls).  
240 Even with higher stimulation powers we observed no changes in the optogenetic sensitivity of  
241 cells in the stimulated regions (Figure S9A,B). This result shows that amplification in response  
242 to these novel non-sensory stimuli requires an associative (behavioral) context.



243 **Statistics of visual responses are unchanged after optogenetic learning at both the**  
 244 **training and control sites**

245 Previous studies suggest that learning in visual perceptual tasks can lead to changes in the  
 246 tuning properties of responsive neurons in mouse V1<sup>19,24</sup>. However, it remains unresolved if  
 247 these perceptual learning changes arise from plasticity in the local cortical networks, or if  
 248 changes may be inherited from thalamic input pathways that could in principle adjust input  
 249 strength, state, or synchrony<sup>56–59</sup> to change cortical responses. Since optogenetic stimulation  
 250 bypasses feedforward input from the thalamus, we asked whether the visual response  
 251 properties of V1 neurons would change with optogenetic learning.

252 We imaged V1 neurons as mice were shown a series of visual stimuli before and after  
 253 optogenetic learning (Figure 3A-D; Methods). We collected the responses of neurons at both  
 254 the optogenetic training location (a V1 imaging site to which the visual stimulus was  
 255 retinotopically matched), and an adjacent control location in V1 where stimuli were not delivered  
 256 for optogenetic learning.

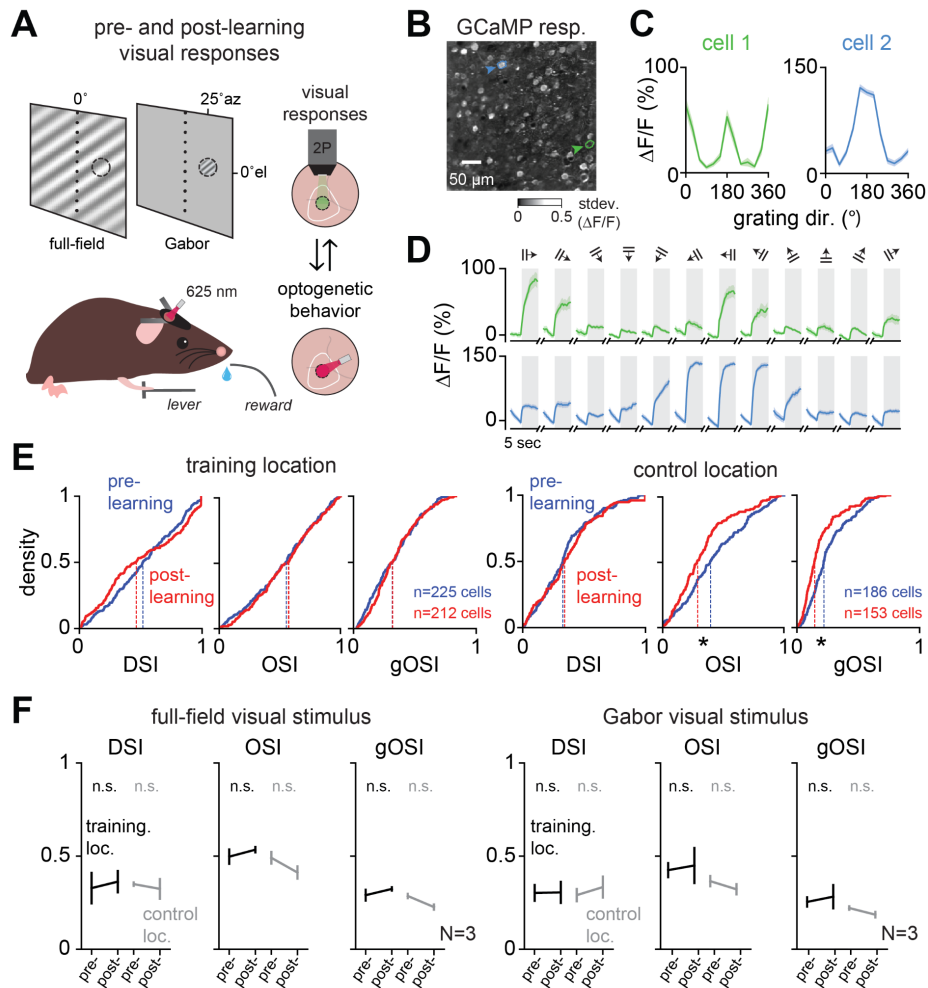

257

258 **Figure 3 - Visual response properties are unchanged after optogenetic learning.** (A) Schematic of experiment  
259 (N = 3 animals, different animals than shown in Figure 2). Visual responses were measured before and after  
260 optogenetic learning (12-direction full-field drifting gratings or monocular Gabors, FWHM 12°) (B) Example pixel-by-  
261 pixel responses (gray: std. dev of  $\Delta F/F$  over imaging frames.) (C) Tuning of two example cells (blue, green outlines in  
262 B). (D) Responses to visual stimulation across the 12 drifting grating directions, same cells in C. (E) Example (N = 1  
263 animal) distributions of unitless indices for direction selectivity (DSI), orientation selectivity (OSI), and global  
264 orientation selectivity (gOSI; Methods), full-field stimulus; \* p < 0.05, Kolmogorov-Smirnoff 2-sample test: p-values:  
265 training location, DSI: 0.06, OSI: 0.90, gOSI: 0.21; control location, DSI: 0.27, OSI:  $7.8 \times 10^{-4}$ , gOSI:  $5.7 \times 10^{-6}$ . (F)  
266 Summary of all visual response indices, both visual stimuli, pre- and post- optogenetic learning (mean  $\pm$  SEM; n.s.: p  
267 > 0.05, N = 3 animals, unpaired t-test, pre- versus post- learning, also Figure S10).

268 Though we found some changes in visual tuning indices (Figure 3E) at both the optogenetic  
269 training and control locations before and after learning, these changes were inconsistent across  
270 animals and comparable in size between the training and control locations (Figure S10A).  
271 Across the population of animals, we found no significant mean changes in the visual response  
272 metrics (Figure 3F), nor in the magnitude of neural responsivity to visual stimuli (Figure S10B).  
273 The per-animal changes might perhaps arise from representational drift over time<sup>60,61</sup>,  
274 potentially explaining why there was little mean change. The lack of mean change is consistent  
275 with the idea that recurrent network changes boost optogenetic responses, while leaving  
276 unchanged other dimensions of network response, as some overlap of responses must occur:  
277 many neurons respond to visual input (Figure 3E, Figure S10A), and with this viral expression  
278 approach, a majority of excitatory neurons express stChrimsonR<sup>46</sup>. Thus, while optogenetic  
279 learning leads to amplification of optogenetic responses, underlying visual response  
280 distributions and the overall structure of existing sensory representations remain intact.

### 281 **A network model shows amplification can be achieved by adjusting a minority of** 282 **recurrent synapses**

283 To understand how recurrent synapses might change to support the amplification we observed,  
284 we trained a recurrent neural network (RNN; Figure 4A) to show amplification. We trained the  
285 network in two steps, first to produce a response that mirrored an optogenetic input delivered to  
286 a fraction of cells (30%; matching previous expression data<sup>46</sup>, and Figures S4 and S5), and then  
287 to produce a response that was twice the size (Figure 4B). We only allowed changes in the  
288 recurrent connections, but not in the input and output weights. During training to produce  
289 amplification, many synaptic weights were adjusted, with a small positive shift in the population  
290 mean weight (Figure 4C,D, Figure S11, mean  $5.8\% \pm$  s.d. 88% change). The stimulated  
291 neurons tended to strengthen their synapses onto other neurons (mean change 31.8%), while  
292 neurons that did not receive optogenetic input showed a small negative synaptic change (mean  
293 change -5.4%). The amplification in this recurrent model shows that synaptic strength changes,  
294 even when restricted to the local recurrent connectivity, can in principle support the amplification  
295 we observed.

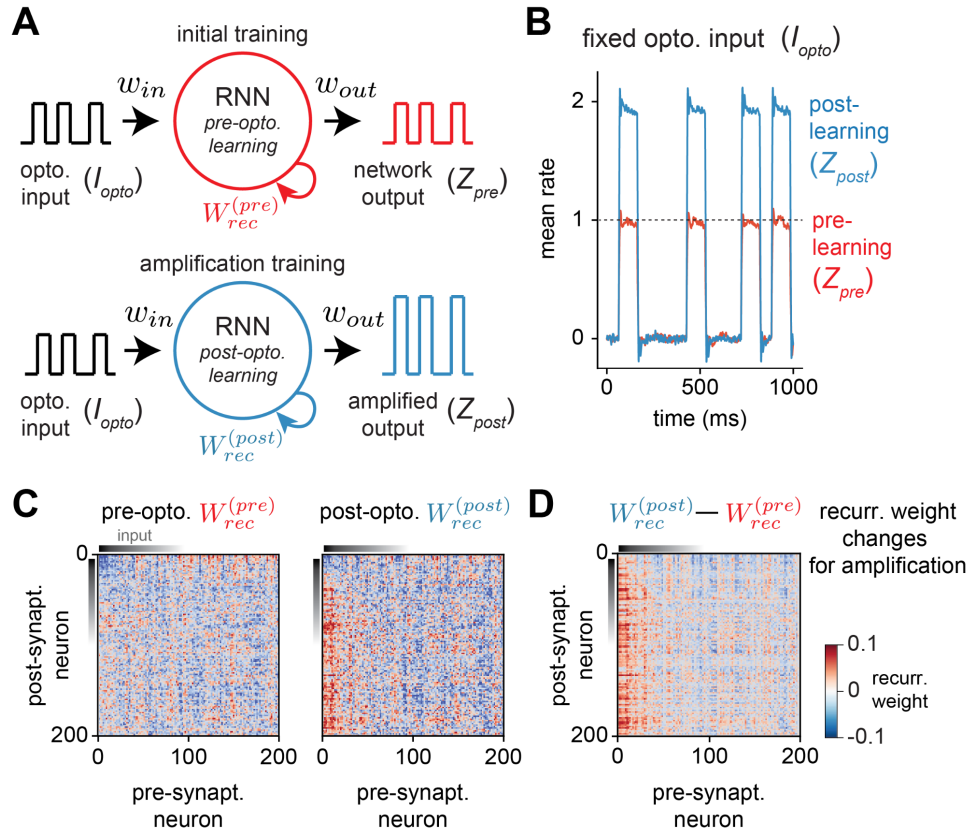

296

297 **Figure 4 - Network amplification for fixed optogenetic input arising from recurrent weight changes.** (A) Two-  
 298 step training of a rate-based RNN of 200 neurons with all-to-all connectivity (Gaussian distributed variance,  $g_0 = 0.8$ ;  
 299 Figure S11; Methods). Fixed input ( $W_{in}$ ) and output ( $W_{out}$ ) weights with 30% of neurons receiving optogenetic input  
 300 ( $I_{opto}$ ), a 100 ms pulse train with a variable rest interval up to 400 ms. Only recurrent weights were trained ( $W_{rec}^{(pre)}$   
 301 and  $W_{rec}^{(post)}$ ). Initial training (red): target output profile was  $Z_{pre} = I_{opto}$ . Amplification training (blue): profile was  $Z_{post} =$   
 302  $2 * I_{opto}$ , a fixed gain of 2. (B) Profiles of target optogenetic output mimics pre- and post- learning amplification ( $Z_{pre}$   
 303 and  $Z_{post}$ , respectively). (C) Resultant weight matrices for initial training ( $W_{rec}^{(pre)}$ ), and amplification training  
 304 ( $W_{rec}^{(post)}$ ). (D) Difference weight matrix ( $W_{rec}^{(post)} - W_{rec}^{(pre)}$ ) showing that amplification resulted in primarily positive  
 305 weight changes across neurons receiving optogenetic stimulation.

306

## 307 Discussion

308 In this work we examine the capacity of adult mouse primary visual cortex (V1) to undergo  
 309 plastic changes in response to novel optogenetic stimuli over a few days of learning. We found  
 310 clear evidence that neural responses to novel stimuli — optogenetic inputs applied directly to  
 311 many cells — are amplified in V1, but only if those stimuli are made behaviorally-relevant. The  
 312 changes in neurons' responses over learning sessions mirrored the animals' perceptual  
 313 improvements. Responses to visual stimuli, which were not relevant for learning, did not show  
 314 systematic changes, suggesting that the layer II/III cortical network was able to selectively  
 315 amplify the input pattern created by optogenetic stimulation. Taken together, our results provide

316 evidence for substantial plastic changes specifically in the primary visual cortex of the adult  
317 mouse brain that are linked to perceptual learning of a completely novel stimulus.

### 318 **Amplification is a desirable representational change for a perceptual detection task**

319 In an optogenetic detection task, the principal neural computation that must be performed is a  
320 comparison between the activity evoked by optogenetic stimulation and spontaneous, ongoing  
321 activity. Therefore, the amplification of the optogenetic signal we found, an increasingly large  
322 spiking response to fixed input, seems to be the optimal way (assuming no major changes in the  
323 noise or variability in the population<sup>62</sup>) for the V1 recurrent network to adjust to improve task  
324 performance.

325 Other studies have found evidence for learning-related changes with optogenetic-stimulation  
326 tasks. Using a discrimination task and stimulating neurons in the somatosensory cortex (S1)  
327 with widefield (1-photon) optogenetics, Pancholi et al.<sup>63</sup> found no evidence for amplification but  
328 did see other changes, including increases in response sparsity. Another study in S1 that used  
329 1-photon stimulation learning<sup>45</sup> found behavioral improvement, but did not examine neural  
330 changes during that learning. In the visual cortex, Marshel et al.<sup>22</sup> trained animals to report  
331 activation of specific neural ensembles activated with 2-photon holographic stimulation. They  
332 found evidence for amplification in two different subnetworks (defined by intrinsic visual  
333 responses), but less-consistent changes for random-ensemble stimulation. In contrast, our work  
334 uses stronger widefield (1-photon) stimulation, and shows robust behavioral changes after  
335 learning that are accompanied by unambiguous V1 neural amplification.

336 The different effects seen in Pancholi et al. might be due to structural differences between V1  
337 and S1 cortical circuits, or may be related to differences in task-specific computations. Their  
338 subjects were asked to discriminate between total stimulation intensity (low versus high number  
339 of optogenetic pulses), rather than discriminate or detect a specific pattern of activity.

340 Prior studies also disagree on interpretation, seemingly due to these differences in  
341 measurement of neural responses. For example, Dalgleish et al.<sup>45</sup> hypothesize that the main  
342 neural changes relevant for behavior are happening downstream, outside the cortical area they  
343 stimulate (S1). Our work shows that there are clear changes occurring in V1 that support this  
344 optogenetic learning, and that those changes appear to be the optimal change to improve task  
345 performance.

### 346 **Readout changes and representational changes**

347 Our results appear to help resolve a contradiction in recent optogenetic stimulation studies.  
348 Some studies have found animals can detect the activation of approximately 40 neurons, in  
349 somatosensory cortex (S1)<sup>45</sup>, and the olfactory bulb<sup>64</sup>. However, other work has found that only  
350 a subset of animals reported activation of similarly-sized groups of randomly selected V1  
351 neurons<sup>22</sup>. While a possible explanation may be differences between brain areas, our data  
352 suggest a different explanation: that detection of randomly-selected small ensembles of neurons  
353 requires initial learning with stronger stimulation. The S1 and olfactory bulb studies initially  
354 trained animals using 1-photon (widefield) optogenetics, as we use here. Thus, these

355 optogenetic results, along with electrical stimulation studies<sup>65-70</sup> imply that, in many brain areas,  
356 animals can use completely novel, randomly-chosen patterns of neural stimulation, but to do so,  
357 learning must first be induced by strong stimulation of hundreds of neurons or more.

358 While we found significant changes in cortical representations during learning, it is possible that  
359 the readout mechanism improves as well. Our data might suggest there are changes in readout,  
360 beyond V1 changes in amplification, as we found larger improvements in behavioral  
361 performance than in cortical responses (percent changes in stimulation power needed to do the  
362 task vs. percent changes in neural responses; Figures 1 and 2), though interpretation is difficult  
363 due to potential opsin saturation and potential nonlinear or variability-dependent readout<sup>62,71</sup>.  
364 Dalglish et al. also provide evidence that readout changes occur in optogenetic-learning tasks:  
365 they found that high detection performance generalized across different stimulated patterns of  
366 cortical neurons. That is, after learning, animals did well at detecting the activation of not just a  
367 single trained subset of up to 100 neurons, but many different sets of up to 100 neurons. On the  
368 other hand, Marshel et al., who also stimulated randomly selected groups of up to approximately  
369 100 neurons, found little generalization from one randomly-selected pattern to the next (their  
370 Figure 4I). Several differences might explain the divergent results: differences in cortical area, or  
371 difference in behavioral task: single-pattern detection vs. two-pattern discrimination. While our  
372 results show that cortical circuits can change with optogenetic learning, it is still possible that in  
373 some circumstances the decoding mechanism can also change during optogenetic learning.

374 The learning that we observed here seems likely to be a change in optogenetic sensitivity and  
375 not related to changes in movements. Our animals were pre-trained on a visual detection task  
376 before introducing the optogenetic stimulus (Figure S1A,B). Thus, the task demands and motor  
377 responses were fixed, and the only learning step needed was for animals to gain the ability to  
378 perceive and report the novel optogenetic activity induced in the cortex.

### 379 **Amplification happens via consolidation, with the largest changes outside sessions**

380 Because we measured neural responses during task performance, we were able to determine  
381 whether amplification happened within the training sessions or developed from one day to the  
382 next. We found that within-session, there were small or negative changes in neural responses to  
383 a fixed stimulus (Figure S8), though there were consistent changes from one learning session to  
384 the next (Figure 2). While some decreases in response within-session could, in principle, be due  
385 to bleaching of opsin or indicator, the changes from one session to the next suggests that the  
386 major cortical network changes were happening outside sessions, perhaps as animals rested or  
387 slept. This is reminiscent of the consolidation that happens in motor learning, where a significant  
388 component of the motor improvement also appears to occur outside of the actual learning or  
389 practice repetitions<sup>72,73</sup>.

390 Our physiological recordings found learning-related neural changes over the initial few days of  
391 optogenetic learning (5-6 days), consistent with previous reports<sup>22,45,63</sup>. However, we also  
392 measured continued improvement in optogenetic detection performance (without neural  
393 imaging) over many weeks to months of training (Figure 1). It seems possible that additional  
394 cortical amplification happens during this longer phase as well. This is supported by studies of

395 long-term deafferentation, which have demonstrated that cortical responses can change over  
396 months or years to accommodate input changes<sup>74,75</sup>.

### 397 **Pattern amplification in cortex due to recurrent connectivity**

398 We found that optogenetic learning produced little change in the visual response properties of  
399 targeted neurons (Figure 3). In principle, the observed increase in cortical responses to the  
400 optogenetic stimulus could have arisen from changes outside the local cortical network that  
401 would not be due to modification of recurrent connections. These outside sources might be  
402 changes in top-down, higher-order thalamic (e.g., from the lateral posterior nucleus, LP /  
403 pulvinar) or neuromodulatory input that change the gain of V1 neurons. In addition, individual  
404 cells might change their intrinsic excitability<sup>76</sup>. However, were top-down input changes, intrinsic  
405 excitability, or neuromodulatory effects the dominant players, we might expect effects on visual  
406 responses as well. Theoretical work also shows that response amplification to a fixed input can  
407 be created in recurrent networks by adjusting the synaptic connectivity within the network<sup>34,35,77</sup>.  
408 Pattern completion observations in cortex<sup>78</sup> are also consistent with response amplification, as  
409 amplification of a particular input pattern is closely related to completion, where a partial input  
410 pattern, via the recurrent network, induces larger responses in the neurons that compose the  
411 activity pattern. Finally, spinogenesis in motor cortex accompanies motor learning<sup>79,80</sup> and  
412 chronic optogenetic stimulation *in vitro* can also produce recurrent changes<sup>81</sup>. Together, along  
413 with the timecourse of the changes we saw, over the course of several days of practice, these  
414 observations suggest that changes in local recurrent cortical synapses are a likely mechanism  
415 for the learning-related neural changes we observed.

416 What circuit mechanism might gate, or enable, cortical recurrent plasticity, to allow changes  
417 during behavior but not for inputs presented outside a behavioral context? There is substantial  
418 evidence that inhibitory modulation is involved when such cortical network changes occur<sup>9,82–88</sup>  
419 and alternation of perineuronal networks, which surround many inhibitory neurons, participate in  
420 these synaptic changes<sup>89–95</sup>. Since the response changes we observed are dependent on  
421 animals performing a rewarded behavioral task, a compelling possibility is that task context or  
422 reward prediction signals trigger activation of inhibitory neurons, which opens the gate for  
423 plasticity, enabling changes to begin.

### 424 **Conclusion**

425 How the cerebral cortex builds sensory representations for use in behavior is key to  
426 understanding brain function. Though the adult visual cortex is less plastic than the developing  
427 cortex<sup>96–98</sup>, our results – cortical amplification in response to completely novel artificial patterns  
428 of optogenetic input – provide key insights into how brains can adapt to behaviorally-relevant  
429 sensory information throughout our lifetimes.

430

431 **STAR★Methods**

432 **Key resources table**

| Reagent type (species) or resource     | Designation                       | Source or reference    | Identifiers          | Additional information |
|----------------------------------------|-----------------------------------|------------------------|----------------------|------------------------|
| Genetic reagent ( <i>M. musculus</i> ) | Emx1-Cre                          | The Jackson Laboratory | RRID:IMSR_JAX:005628 | 21 total animals       |
| Recombinant DNA reagent                | AAV9-hSyn-FLEX-GCaMP6f            | Addgene                | #100833              |                        |
| Recombinant DNA reagent                | AAV9-hSyn-jGCaMP7s                | Addgene                | #104487              |                        |
| Recombinant DNA reagent                | AAV9-hSyn-jGCaMP8s                | Addgene                | #162377              |                        |
| Recombinant DNA reagent                | AAV1-hsyn-FLEX-ChrimsonR-tdTomato | Addgene                | #62723               |                        |
| Recombinant DNA reagent                | AAV9-hSyn-DIO-stChRimsonR-mRuby2  | Addgene                | #105448              |                        |

433

434

## 435 **Resource availability**

### 436 **Lead contact**

437 Further information and requests for the resources should be directed to and will be fulfilled by  
438 the lead contact, Mark H. Histed (mark.histed@nih.gov).

### 439 **Materials availability**

440 This study did not generate new unique reagents.

## 441 **Methods details**

### 442 **Animals**

443 All experimental procedures were approved by the NIH Institutional Animal Care and Use  
444 Committee (IACUC) and complied with Public Health Service policy on the humane care and  
445 use of laboratory animals. Emx1-Cre mice (Cre-recombinase targeted at the Emx1 locus<sup>99</sup>, Jax  
446 stock no. 005628, N = 21) were used for all experiments. N = 9 animals were used for  
447 optogenetic behavior without imaging (Figure 1), N = 4 for optogenetic behavior plus  
448 simultaneous 2-photon imaging (Figure 2), N = 3 for mock behavior with optogenetic stimulation  
449 only (Figure 2), N = 2 for non-behavior optogenetic stimulation (Figure S9), and N = 3 for visual  
450 stimulation before and after optogenetic behavior (Figure 3). Animals were housed on a reverse  
451 light/dark cycle.

### 452 **Cranial window implantation and viral injection**

453 Mice were given intraperitoneal dexamethasone (3.2 mg/kg) and anesthetized with isoflurane  
454 (1–3% in 100% O<sub>2</sub> at 1 L/min). Using aseptic technique, a titanium headpost was affixed using  
455 C & B Metabond (Parkell) and a 3 mm diameter craniotomy was made, centered over V1 (–3.1  
456 mm ML, +1.5 mm AP from lambda).

457 Mice were injected with a pre-mixed combination of two adenovirus-mediated (AAV9) vectors  
458 for expression in the cortex, a functional calcium indicator (AAV9-hSyn-jGCaMP7s or -  
459 jGCaMP8s, viral titers  $3.0 \times 10^{13}$  and  $4.1 \times 10^{13}$  GC/ml respectively, final dilution 1:10) construct  
460 and a photoactivatable soma-targeted opsin construct (AAV9-hSyn-stChrimsonR-mRuby2, viral  
461 titer  $3.2 \times 10^{13}$  GC/ml, final dilution 1:8). Injections were made 150–250  $\mu$ m below the surface of  
462 the brain for expression in layer II/III neurons. Multiple 300 nL injections were done at 150  
463 nL/min to achieve widespread coverage across the 3 mm window. Animals were not reinjected.

464 A 3 mm optical window was then cemented into the craniotomy, providing chronic access to the  
465 visual cortex. Post-surgery, mice were given subcutaneous 72 hr slow-release buprenorphine  
466 (0.5 mg/kg) and recovered on a heating pad. Virus expression was monitored over the course of  
467 3 weeks. We selected animals with good window clarity and high levels of virus co-expression  
468 (GCaMP and stChrimsonR) for behavior and imaging experiments.



## 469 **Retinotopic mapping**

470 We determined the location of V1 in the cranial window prior to GCaMP or opsin expression  
471 using a hemodynamic intrinsic imaging protocol previously described in<sup>100</sup>. Briefly, we delivered  
472 small visual stimuli to head-fixed animals at different retinotopic positions and measured  
473 hemodynamic-related changes in absorption by measuring reflected 530 nm light. Imaging light  
474 was delivered with a 530 nm fiber-coupled LED (M350F2, Thorlabs). Images were collected  
475 through a green long-pass emission filter onto a Retiga R3 CCD camera (QImaging Inc.,  
476 captured at 2 Hz with 4 × 4 binning). The hemodynamic response to each stimulus was  
477 calculated as the change in reflectance of the cortical surface between the baseline period and  
478 a response window starting 2–3 s after stimulus onset. We fit an average visual area map to the  
479 cortex based on the centroids of each stimulus' V1 hemodynamic response.

480 These retinotopic maps were used during behavioral training to overlap the visual stimulus  
481 position in the right monocular hemifield with the imaging/optogenetic stimulation location in the  
482 V1. We found that the transition period between visual detection and optogenetic detection was  
483 facilitated by a strong overlap.

484 For measuring visual response properties, we further refined the visual position by measuring  
485 cellular responses in layer II/III with 2-photon imaging. Small oriented noise visual stimuli (14°  
486 FWHM) were presented at 9 locations (spaced by ±15° azimuth and ±10° elevation) in the right  
487 visual hemifield. The visual stimulus position that evoked the greatest response in the FOV was  
488 chosen for characterizing visual responses. We found that the strongest response was typically  
489 the center location, selected using the widefield hemodynamic map above.

## 490 **Behavioral task**

491 Water-restricted mice (20–40 ml/kg/day) were head-fixed and trained first to hold a lever and  
492 release in response to a visual stimulus (Gabor patch; 14° FWHM, spatial frequency 0.1  
493 cycle/degree), that increased contrast relative to a gray screen<sup>100,101</sup>, and then to an optogenetic  
494 stimulus that directly activated layer II/III neurons in V1. Mice initiated behavioral trials by  
495 pressing and holding a lever for 400–4000 ms (according to a geometric distribution, to reduce  
496 variation in the stimulus appearance time hazard function, see<sup>100</sup>), and then the stimulus  
497 appeared for 100 ms in the animal's right monocular hemifield. Animals had up to 550 ms to  
498 report the stimulus by releasing the lever. Because some minimum time is required to process  
499 the stimulus, we counted as false alarm trials those releases that occurred within 50–100 ms of  
500 the stimulus onset. Correct detection responses resulted in delivery of a 1–5 µL liquid reward (10  
501 mM saccharine). We varied the liquid reward during training<sup>101</sup>, increasing reward after up to  
502 three consecutive correct trials, to decrease incentive for guessing<sup>102</sup>. Once proficient, reward  
503 volume did not fluctuate significantly across sessions.

504 All behavioral animals were first trained on a visual detection task (see task schematic, in Figure  
505 S1, and<sup>100</sup>). Once animals were performing well on the visual task and produced stable  
506 psychometric curves with low lapses for three consecutive sessions, we transitioned the animal  
507 to using the optogenetic stimulus by pairing each visual stimulus appearance with a fixed power  
508 (0.5 mW) optogenetic stimulation. During these transition sessions we lowered the contrast of

509 the visual stimulus until animals could perform the task without the visual stimulus. The session  
510 where animals started behaving exclusively on the optogenetic stimulus was denoted session 0.  
511 During session 0 we generated the first psychometric curve for optogenetic stimulation. Analysis  
512 of data from session 0 came only from the part of trials where the animal was exclusively on the  
513 optogenetic stimulus. Subsequent behavioral sessions were started and conducted with only  
514 optogenetic stimuli. Animals used in behavior were not exposed to any other 1-photon  
515 stimulation outside of behavior and the craniotomy was kept covered by an opaque cap  
516 between sessions.

## 517 **Optogenetic stimulation**

518 For optogenetic behavior experiments without simultaneous 2-photon imaging we delivered light  
519 through a fiber aimed at the cortical surface<sup>100</sup>. A fiber-coupled LED light source (M625F2,  
520 Thorlabs, peak wavelength  $625 \pm 15$  nm, FWHM) was coupled via a fiber patch cable to a fiber  
521 optic cannula (400  $\mu$ m core diameter, 0.39 NA, Thorlabs CFMLC14L02) cemented above V1.  
522 This method was used for long-term learning and control experiments with increased  
523 optogenetic stimulation outside of behavior (powers up to 1mW with  $6.3 \pm 1.7$ s between  
524 simulations, mean  $\pm$  SD, N = 2).

525 For optogenetic behavior experiments conducted with simultaneous 2-photon imaging we  
526 activated stChrimsonR expressing neurons by passing 595 nm light (CoolLED pE4000  
527 multispectral illuminator,  $595 \pm 15$  nm, FWHM) through the imaging objective to the surface of  
528 the brain. The illumination power was measured through the objective at the beginning of each  
529 session using a light meter (Newport 1918-C with a 918D-SL-OD3R detector) with a maximum  
530 of  $\sim 0.5$  mW.

## 531 **Analysis of behavioral data**

532 Analyses were conducted in Matlab and Python. Optogenetic learning effects were  
533 characterized by analyzing data collected during animal behavior on the optogenetic stimulation  
534 detection task.

535 Reaction times were averaged across trials for each laser power group and for each training  
536 session. Linear fits were calculated for these data points across the start and end sessions in  
537 which each laser power group was present during the task. The slope of the linear fit indicated  
538 the change in reaction time per session for each laser power group. A mean change in reaction  
539 time per training session was then calculated across all laser powers for each animal. Changes  
540 in optogenetic detection sensitivity were analyzed by fitting cumulative Weibull functions to data  
541 from individual training sessions to estimate detection performance (hit rate) as a function of  
542 laser power. Quantifying thresholds with  $d'$  (sensitivity) produces similar results to using hit rate  
543 in this task, as false alarm rates are nearly constant over time (false alarm hazard rate is near  
544 constant, see<sup>100</sup>). Threshold was the 50% point of the Weibull functions.

## 545 **2-photon calcium imaging**

546 2-photon calcium imaging was conducted using a custom microscope based on MIMMS  
547 (Modular In vivo Multiphoton Microscopy System, e.g.,<sup>103</sup>) components (Sutter Instruments,  
548 Novato, CA) with a Chameleon Discovery NX tunable femtosecond laser (Coherent, Inc.; Santa  
549 Clara, CA). Imaging was performed using a 16X water dipping objective (Nikon; Tokyo, Japan).  
550 A small volume of clear ultrasound gel (~1 mL) was used to immerse the lens. Images of  
551 calcium responses (~150-200  $\mu\text{m}$  from the surface of the pia, layer II/III) were acquired at 30 Hz  
552 using  $\leq 50$  mW laser power for static imaging, and  $\leq 15$  mW for behavior at 920 nm.

## 553 **Analysis of imaging data**

554 Raw 2-photon image stacks were downsized (512 rows to 256 rows) to facilitate handling of  
555 large datasets. For each behavioral session, frames were motion corrected using CalmAn<sup>104</sup>.  
556 Each imaging data set was baseline corrected to an estimated minimum pixel intensity,  
557 calculated as the minimum value in the average projection image across all frames from all trials  
558 prior to stimulus presentation ( $F_{\text{min}}$ , a scalar). The minimum pixel intensity was subtracted from  
559 all pixels and all resulting negative values were set to 0.

560 For quantitative analyses we computed  $\Delta F/F$  as  $(F-F_0)/F_0$  at each pixel.  $F_0$  was taken over the  
561 10 frames before each stimulus onset, and  $F_0$  did not systematically change over days (see also  
562 Figure S3). For statistical analyses  $F$  was taken as the frame 120 ms after the stimulus onset  
563 (frame 3 post-stimulation, near the peak response). For visual display of responses in entire  
564 frames, as in Figure 2C,  $F$  was taken over 0-270 ms after stimulus onset (frames 0-9 post-  
565 stimulation), and we computed  $\Delta F/F$  as  $(F-F_0)/F_{\text{div}}$ , where  $F_{\text{div}}$  is  $F_0$  smoothed with a gaussian  
566 filter ( $\sigma = 20$  pix). Using a smoothed divisor image averages overall intensity in small  
567 regions of the image, yielding a form of local contrast adaptation. Image ROI fluorescent ( $F$ )  
568 activity traces were measured by calculating the average pixel intensity within a user-defined  
569 ROI, prior to computing  $\Delta F/F$  for an ROI. Deconvolved calcium responses to estimate spiking  
570 activity for an ROI were calculated using the OASIS method with an autoregressive constant of  
571  $1^{53}$ .

572 Segmented cell masks were identified using either Suite2p (for Figure 2)<sup>55</sup> or CalmAn (for  
573 Figure 3)<sup>104</sup> and their resulting calcium responses ( $F$ ) were extracted. In order to quantify  
574 neuropil activity, we manually segregated cell bodies from their surrounding neuropil with non-  
575 overlapping masks (for Figure 2, details in Figure S6). We fit the fluorescence decays of cell  
576 bodies neuropil by a single exponential in a post-stimulation window (300 ms, starting 1 frame  
577 after cessation of optogenetic stimulation). Suppression effects were characterized in a 1.5 s  
578 post-reaction time window (starting 350 ms after optogenetic stimulus presentation, well after  
579 the median reaction time (~250 ms) for the detection behavior).

580 Linear regression model for testing for effects of change between experimental days was OLS  
581 regression, using all trials on which the stimulus was successfully detected. Data was from  $N =$   
582 3 animals,  $N = 6$  sessions for each animal, and 2633 total number of stimulation trials (all  
583 animals and sessions are shown in Figure S8, including the same analysis of  $N = 3$  mock  
584 behavior control animals). Regression model equation:  $\Delta F/F \sim C(\text{animal}) * C(\text{session}) +$

585 stimulation\_power\_mw + trial\_number + constant, where C(x) signifies a categorical or dummy  
586 variable. Full details of the model definition are in <https://patsy.readthedocs.io/en/latest/>.

587 We also tested for significant change in  $\Delta F/F$  within-session by running the same model over  
588 each animals' data, and found all three animals showed a negative change (trial number  
589 coefficient: -1.5, -1.1, -0.2%  $\Delta F/F$ ) though only two were significantly different from zero ( $p < 1 \times$   
590  $10^{-12}$ ,  $< 1 \times 10^{-6}$ , = 0.6, respectively).

591 Linear regression model for testing effects of optogenetic stimulation outside of behavior (results  
592 in Figure S9) was OLS regression from N = 2 animals, session 0 (S0) vs. session 6 (S6) via  
593 ANOVA. Regression model equation:  $\Delta F/F \sim C(\text{power}) + C(S0 \text{ v. } S6)$ , where C(x) indicates a  
594 categorical or dummy variable.

### 595 **Confirming optogenetic stimulation power between sessions**

596 We measured the power of the stimulation LED light path immediately before each behavioral  
597 session. We also measured relative laser excitation power across days by measuring light  
598 collected by the PMTs during stimulation. The optogenetic blanking circuit operates the LED  
599 illuminator during the flyback phase of scanning image acquisition, and the refractory time of the  
600 blanking circuit leaves an up to ~20 pixel artifact at the edges of the raw image stacks that  
601 scales with stimulation intensity. We used the mean pixel intensity change for this artifact to  
602 scale attenuated sessions and normalize stimulation powers across days (Figure S4), and our  
603 results were unchanged with and without this scaling, confirming we accurately measured  
604 stimulation power.

### 605 **Analysis of visual response properties**

606 2-photon calcium imaging was performed directly before and after optogenetic learning to  
607 assess V1 neural responses at both training and control locations (an area with stable  
608 expression at least 200  $\mu\text{m}$  away from training location). Visual stimuli were presented on a  
609 monitor positioned in front of the head-fixed animal at a 45° angle on the animal's right side. The  
610 visual stimulus was either a full-field or Gabor patch (12° FWHM) drifting grating stimulus at  
611 100% contrast presented in 12 different directions (30° increments). Stimuli were presented for  
612 3 second durations (with 4 seconds between presentations) and were delivered in random order  
613 for a total of 25 repetitions of each stimulus direction. Gabor patch stimuli were displayed on the  
614 monitor at the visual field location corresponding to the retinotopic map at the training and  
615 control locations.

616 To assess potential changes in visual response selectivity, direction and orientation selectivity  
617 indices were calculated for each identified cell<sup>105,106</sup>. First, tuning curves for each cell were  
618 calculated by averaging  $\Delta F/F$  responses across the 3 second stimulus period across all  
619 repetitions for each of the 12 drifting grating directions. Direction selectivity indices (DSI) were  
620 measured as  $(R_{\text{pref}} - R_{\text{oppo}})/(R_{\text{pref}} + R_{\text{oppo}})$ , where  $R_{\text{pref}}$  is the peak average response across the  
621 12 directions and  $R_{\text{oppo}}$  is the average response at the opposite direction 180° away from the  
622 preferred direction. Orientation selectivity indices (OSI) were measured by first averaging  
623 responses from opposite pairs of directions (e.g., 0° and 180°, 45° and 225°) and calculating

624  $(R_{\text{pref}} - R_{\text{ortho}})/(R_{\text{pref}} + R_{\text{ortho}})$ , where  $R_{\text{pref}}$  is the peak average response across the 6 orientations,  
625 and  $R_{\text{ortho}}$  is the average response of the orthogonal orientation  $90^\circ$  away from the preferred  
626 orientation. Last, a global OSI (gOSI) metric was calculated as  $1 - \text{CV}$  (tuning curve) for each  
627 cell, where CV is the circular variance.

## 628 **Modeling**

629 We trained a recurrent neural network (RNN) consisting of  $N = 200$  units, whose input dynamics  
630 for the  $i$ -th neuron are given by:

631

$$\tau \frac{dx_i}{dt} = -x_i + \sum_{j=1}^N W_{ij}^{\text{rec}} \phi(x_j) + I^{\text{opto}}(t) w_i^{\text{in}} + \eta_i$$

632

633

634 The readout of the network is defined as:

635

$$Z(t) = \sum_{i=1}^N w_i^{\text{out}} \phi(x_i)$$

636

637

638 The transfer function of single units is  $\phi(x) = \tanh(x)$ . The weights of the input pattern  $w_{in}$   
639 are positive and exponentially distributed for a fraction  $p = 0.3$  of units, and zero otherwise.

640 The readout weights are homogeneous and constant:  $w_i^{\text{out}} = 1/N$ . The initial recurrent

641 weights  $W_{ij}^{\text{rec}}$ , before any training, are independently sampled from a random Gaussian

642 distribution with mean zero and standard deviation  $g_0/\sqrt{N}$ <sup>107</sup>. The noise term  $\eta_i$  is randomly

643 sampled from a zero mean distribution with standard deviation 0.0005 at every time step.

644

645 We trained the recurrent weights  $W_{ij}^{\text{rec}}$  of the RNN using backpropagation-through-time (ADAM

646 optimizer<sup>108</sup> in pytorch<sup>109</sup> such that the network readout  $Z$  matches a scaled version of the

647 time-varying input  $I^{\text{opto}}(t)$ . The input and output weights remained fixed. In a first phase,

648 mimicking the pre-learning response, we trained the network for 100 epochs such that

649  $Z_{\text{pre}} = I_{\text{opto}}$ , obtaining recurrent weights  $W_{\text{rec}}^{(\text{pre})}$ . In a second phase, we trained the pre-

650 learning network on 100 epochs to produce an amplified response,  $Z_{\text{post}} = 2I_{\text{opto}}$ , with

651 recurrent weights  $W_{\text{rec}}^{(\text{post})}$ . Parameters:  $\tau = 10$  ms,  $g_0 = 0.8$ , Euler integration timestep

652  $\Delta t = 1$  ms, learning rate 0.01.

653

654 To compute the normalized synaptic weight change in percent, we took the mean of the  
655 absolute value of weight across all synapses during the pre-training period, yielding a scalar  
656 value, and divided each synaptic weight by this scalar and multiplied by 100.

## 657 **Acknowledgments**

658 We thank Victoria Scott for assistance with breeding and husbandry. A. Afraz, B. Averbek, and  
659 members of the Histed laboratory for comments and discussion. This work was supported by  
660 the NIH Intramural program (ZIAMH002956) and NIH BRAIN Initiative (U19NS107464 and  
661 U01NS108683).

## 662 **Author contributions**

663 B.A., H.D., P.K.L., L.R., and S.D. collected behavior and imaging data, with the help of Y.D. and  
664 A.L.. B.A., H.D., P.K.L., C.D., J.O., and M.H. performed data analysis. H.D., S.D., A.L., and Z.Z.  
665 prepared optical windows and did virus injections. M.B., B.A., K. R., and M.H. performed the  
666 modeling. B.A., H.D., P.K.L., and M.H. designed the experiments. B.A., H.D., P.K.L., J.O., M.B.,  
667 and M.H. wrote the manuscript.

## 668 **Data availability**

669 The datasets generated during the current study are available from the corresponding author on  
670 reasonable request. Data with plotting code are available at: <https://github.com/histedlab/>

## 671 **Competing Interests**

672 The authors report no competing interests.

673

674

675 **Supplemental Figures**

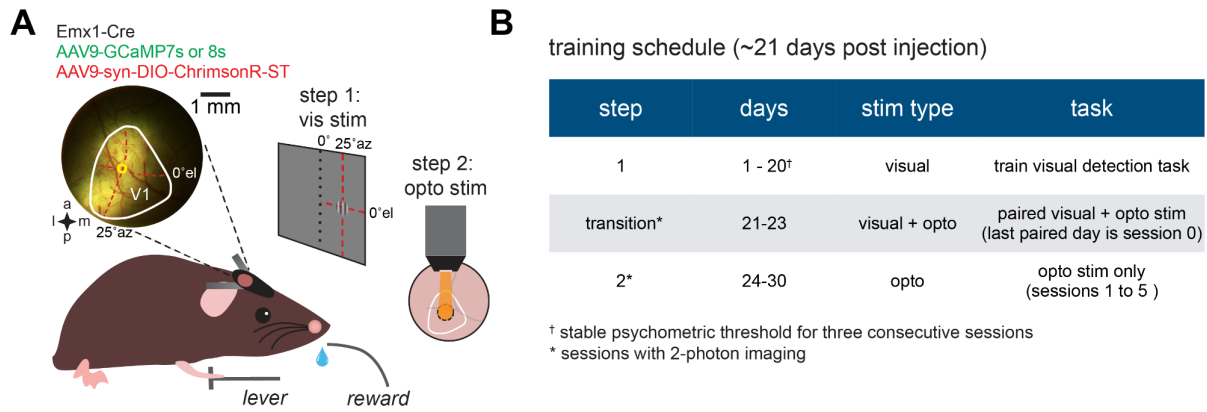

676

677 **Figure S1 - Training timeline for the optogenetic detection task, Related to Figures 1 and 2.** (A) Schematic of 2-  
678 step protocol for behavioral training first on visual stimulus (step 1) then on optogenetic stimulation (step 2). The  
679 optogenetic stimulation location was aligned to the retinotopic location of the visual stimulation in V1. (B) Typical  
680 behavioral training schedule outlining the length of time for visual detection task proficiency and the steps to transition  
681 animals from the visual to the optogenetic stimulus (other statistics in Results). Visual detection proficiency was  
682 determined by animals achieving a stable psychometric threshold for three consecutive sessions (<sup>†</sup>). 2-photon  
683 imaging was conducted during the transition and step 2 sessions (\*).

684

685

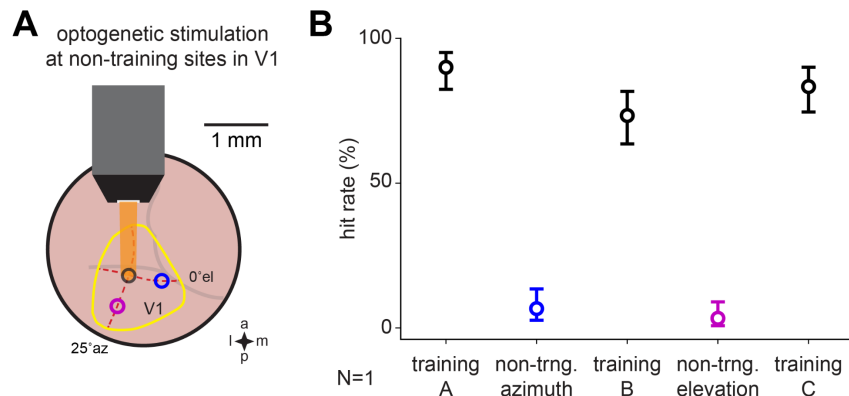

686

687 **Figure S2 - Animals detect and use the optogenetic-induced cortical activity; they do not detect stray light**  
688 **with their retinas, Related to Figure 1 and 2. (A)** Schematic of experiment where we moved the stimulation light  
689 spot a small amount and found dramatic changes in behavior. This implies that animals' behavior depends on cortical  
690 neural optogenetic activation. Black circle indicates optogenetic training location in V1 (yellow outline). After collecting  
691 a psychometric curve at the training location we moved the optogenetic stimulation  $\sim 500 \mu\text{m}$  along the cortex, both in  
692 the visual-map-defined azimuth and elevation meridians (red dotted lines). At each of the shifted locations, blue and  
693 magenta circles, behavioral performance dropped and was recovered when we moved the stimulation back to the  
694 training location. **(B)** Detection hit rates in a trained animal during a session where the optogenetic stimulation  
695 location was sequentially moved for 30 trials each to and from non-trained locations in V1 (black, training A: 90.0 CI  
696 [82.4 - 95.1]%, training B: 73.3 [63.5 - 81.65]%, training C: 83.3 CI [74.5 - 90.1]%, blue, non-training azimuth change,  
697 6.7 CI [2.7 - 13.4]%, magenta, non-training elevation change, 3.3 CI [0.7 - 9.0]%, hit rate  $\pm$  Wald CI, N = 1).

698

699

700



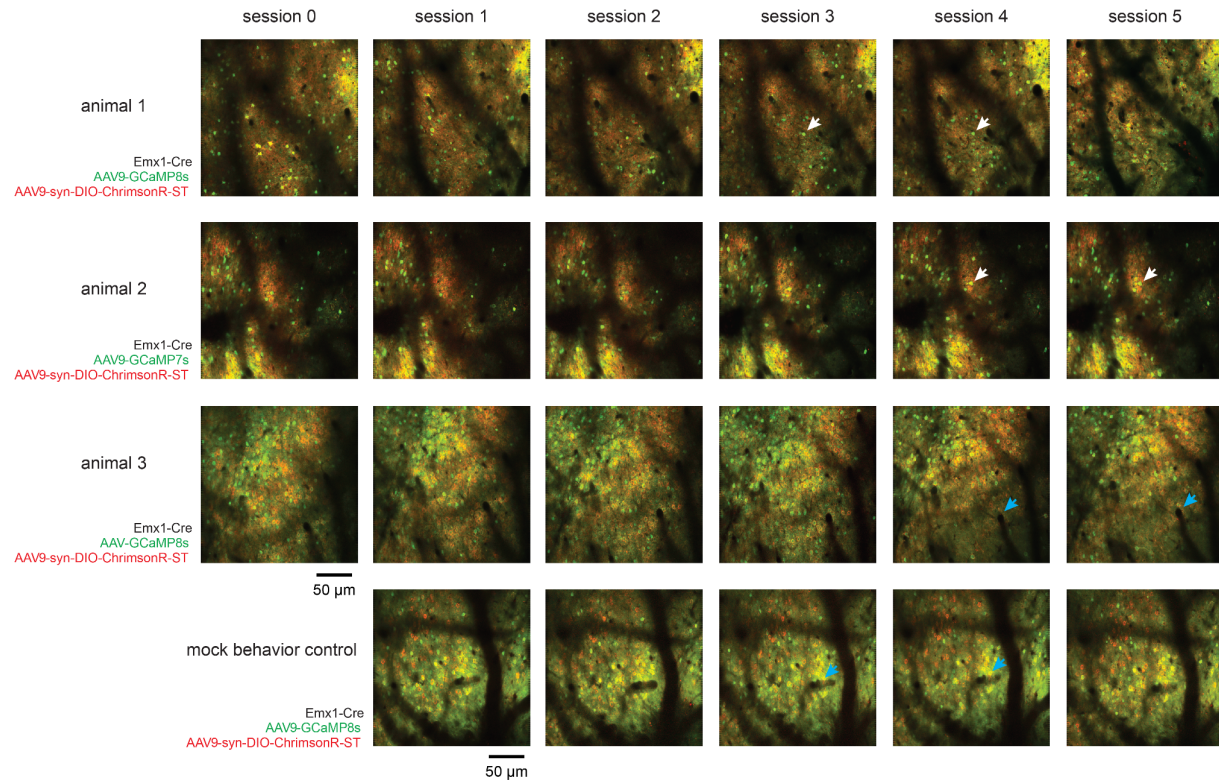

701

702 **Figure S3 - Imaging plane over sessions for optogenetic learning animals and mock behavioral,**  
703 **Related to Figure 2.** Genotypes and viral injections are listed for each animal tested. Imaging planes were aligned to  
704 reference GCaMP expressing cells (examples, white arrows) and vasculature patterns (examples, blue arrows)  
705 between sessions. All Red/Green images shown are 300 frame averages acquired with the same amplifier gain  
706 settings at 1000 nm excitation (~35-45 mW). While some neurons differ from day to day, many of the same neurons  
707 were imaged across days.

708

709

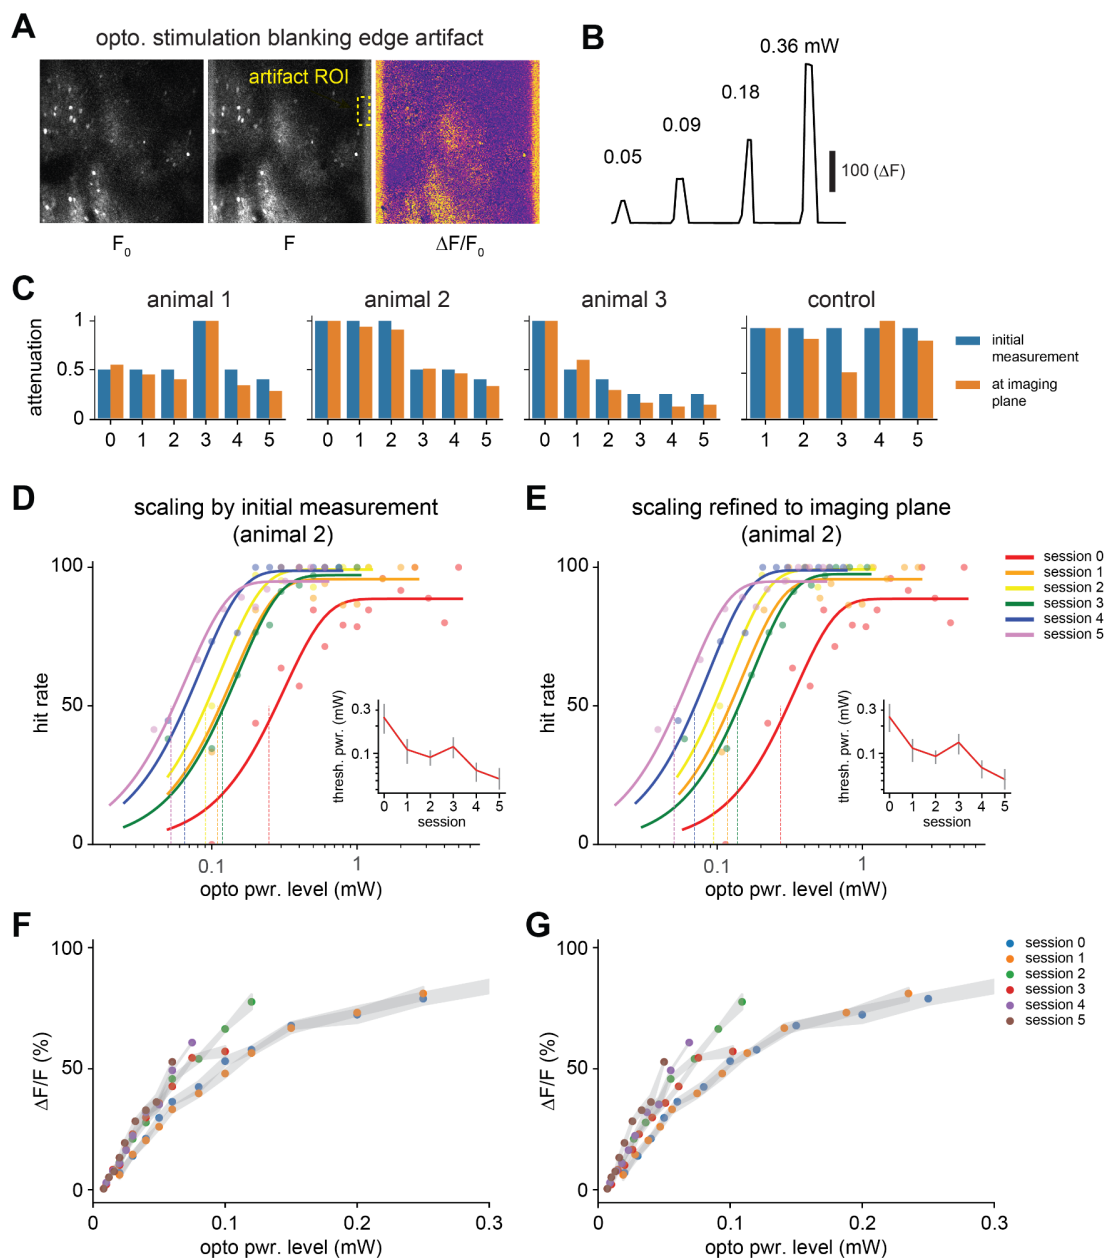

710

711 **Figure S4 - Optogenetic stimulation blanking artifact allows normalization of optogenetic power at the**  
 712 **imaging plane between sessions, Related to Figure 2. (A)** Optogenetic stimulation produces an ~20 pixel edge  
 713 artifact that is visible during imaging, as the optogenetic light source offset lasts a few microseconds into each  
 714 imaging line after horizontal flyback. **(B)** Intensity of the edge artifact scales with applied optogenetic stimulation  
 715 power. **(C)** Plots of attenuation based on initial measurement of power out of the objective and normalized scaling for  
 716 all animals and control. **(D,E)** Normalized scaling refines the position of psychometric curves but does not change the  
 717 order. Normalized scaling does not alter the relationship between threshold powers (insets). **(F,G)** Normalized scaling  
 718 does not alter the relationship between  $\Delta F/F$  and power over sessions.

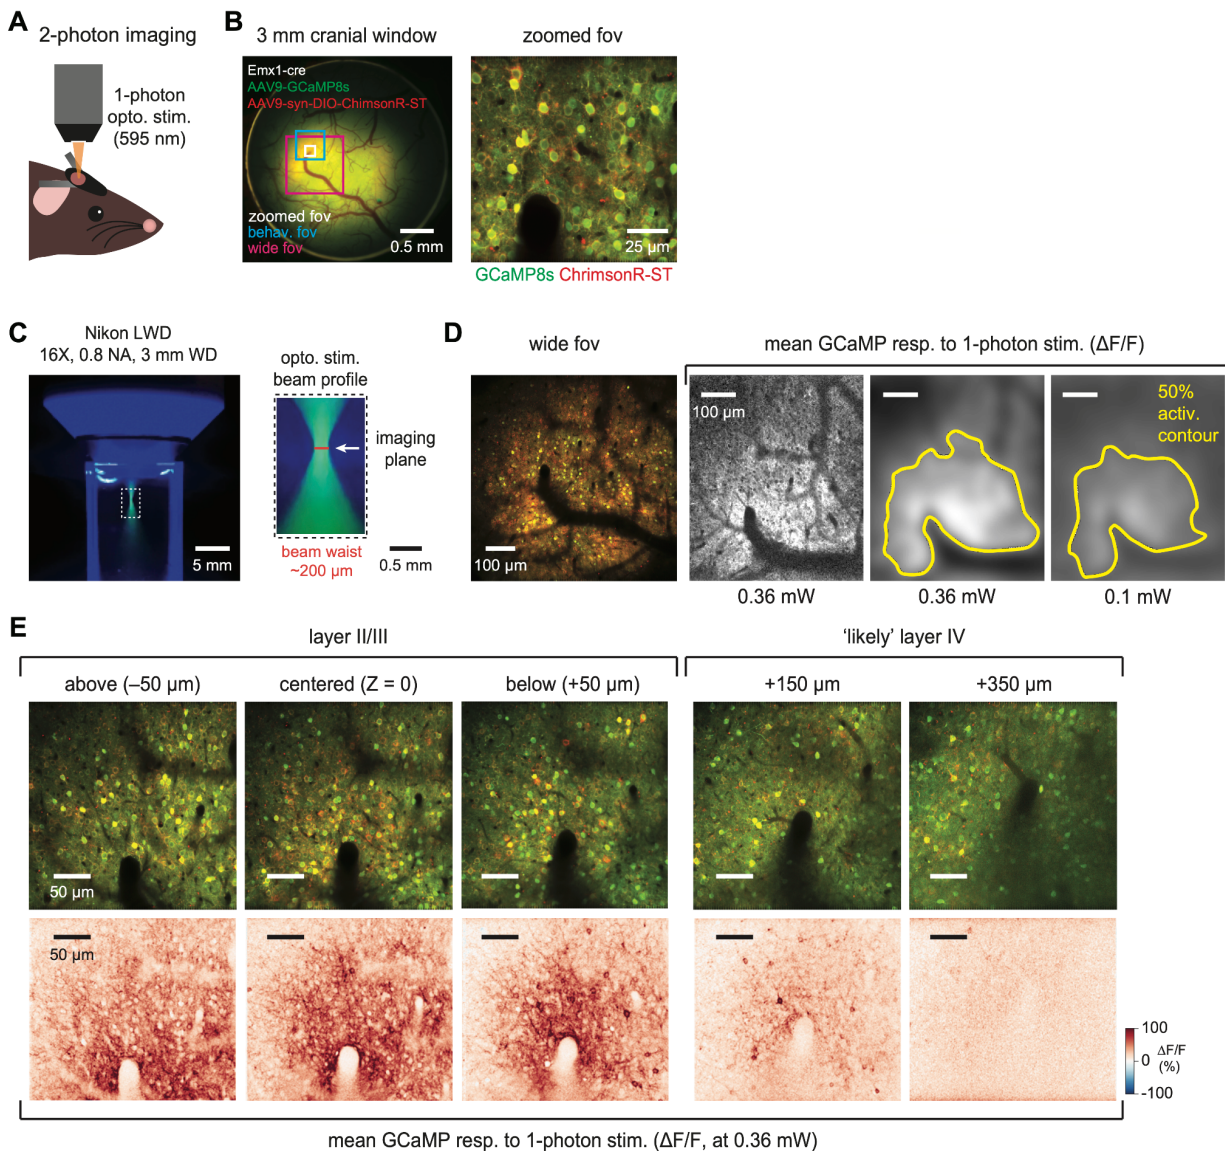

719

720 **Figure S5 - Spatial extent of 1-photon stimulation is confined in lateral and depth axes, Related to Figure 2.**  
 721 (A) Schematic of head-fixed 2-photon imaging, with 1-photon optogenetic stimulation delivered through the objective.  
 722 (B) Widefield fluorescence through craniotomy. AAV9-GCaMP8s (green), stChrimsonR (red), and coexpression  
 723 (yellow) in enlarged field-of-view (FOV). White, red, and blue boxes indicate FOVs for 2-photon imaging. Smallest  
 724 FOV (white box) shown in the right panel, FOV for spatial measurement (red box) D, and FOV used for imaging (blue box)  
 725 during behavior in E. (C) *In vitro* measurement of 1-photon stimulation beam profile in fluorescein solution. White  
 726 dotted box shows the area zoomed on the right. White arrow shows the approximate imaging plane. Approximate  
 727 beam waist is shown in red. (D) GCaMP and stChrimsonR expression in a wide 2-photon FOV. Right panels show  
 728 mean  $\Delta F/F$  response to 1-photon stimulation at two powers (0.36 and 0.1 mW). 50% activation contour is shown by  
 729 the yellow outline. (E) Mean  $\Delta F/F$  response (2-photon imaging with 1-photon optogenetic stimulation) at different  
 730 depths in V1. Left panels show the responses of layer II/III neurons, center labeled panel ( $Z = 0$ , 150  $\mu$ m below the  
 731 cortical surface). Right panels show smaller neural responses in deeper cortical layers ( $+150$  and  $+350 \mu$ m) labeled  
 732 'likely layer IV'.

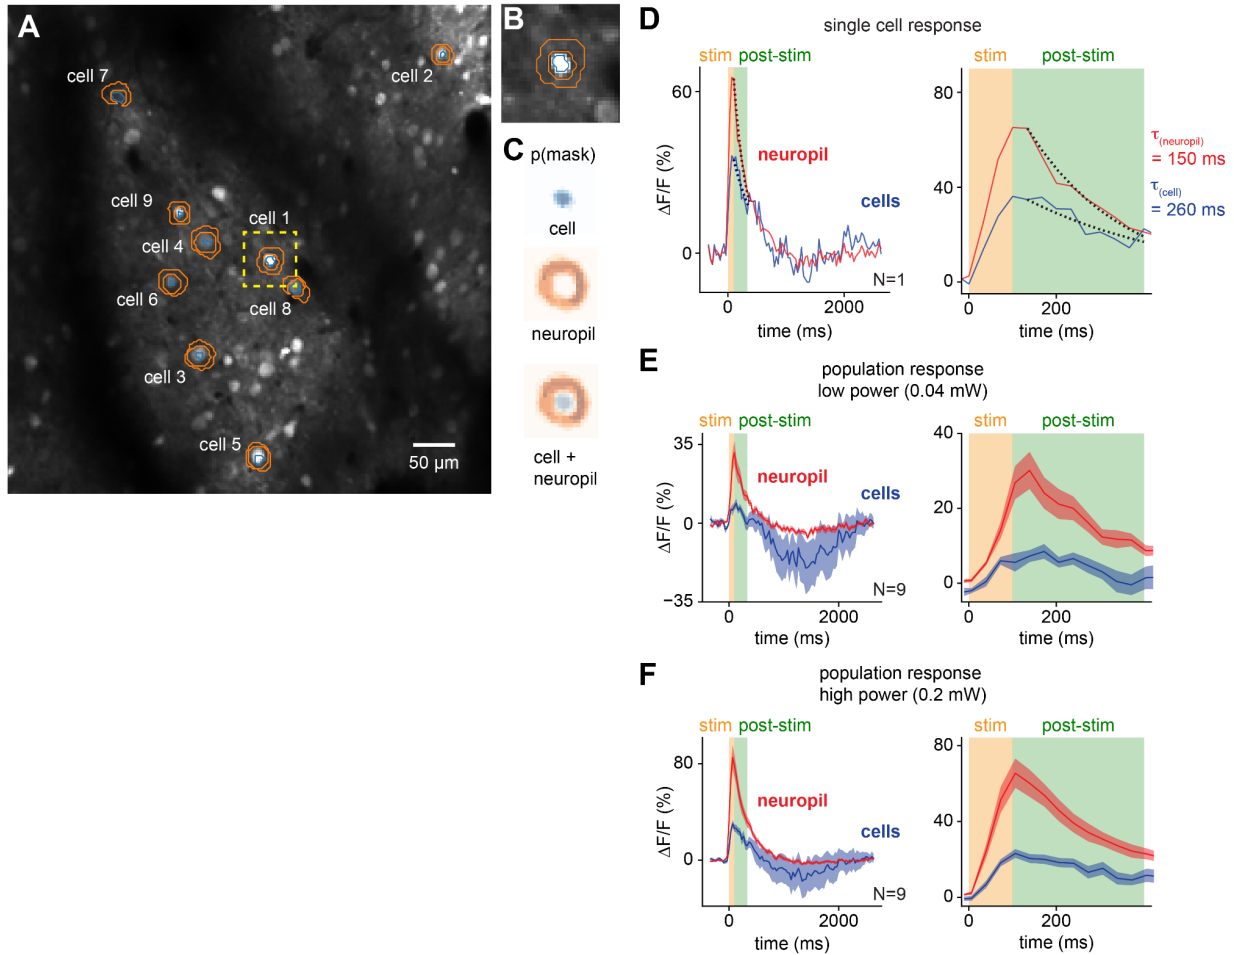

733

734 **Figure S6 - Cell soma and neuropil show distinct decay kinetics, Related to Figure 2.** (A) Field-of-view image  
735 of 2-photon data collection from the first session in 1 animal. Nine relatively isolated cells were selected. An inner cell  
736 body mask was drawn (blue), and an annulus in the surrounding neuropil was drawn (orange), avoiding any nearby  
737 cell bodies. (B) Zoomed in view of cell 1, showing the cell body mask in blue and the neuropil annulus in orange. (C)  
738 Each mask was centered and averaged to produce mask probabilities for each compartment, cell in blue, and  
739 neuropil in orange. (D) Average response to 1-photon stimulation for an example cell for its surrounding neuropil (red)  
740 and the cell body (blue). Left: response zoomed in to the first 500 ms after stimulation onset. A single exponential  
741 decay was fit to each compartment and is depicted by the dotted lines, red and blue for neuropil and cell body  
742 respectively. Tau values represent the half decay times of the exponential decay fits. (E) Population average (N = 9)  
743 responses at 0.04 mW stimulation power, displayed analogously to D. (F) Same as E but for 0.2 mW stimulation  
744 power.

745

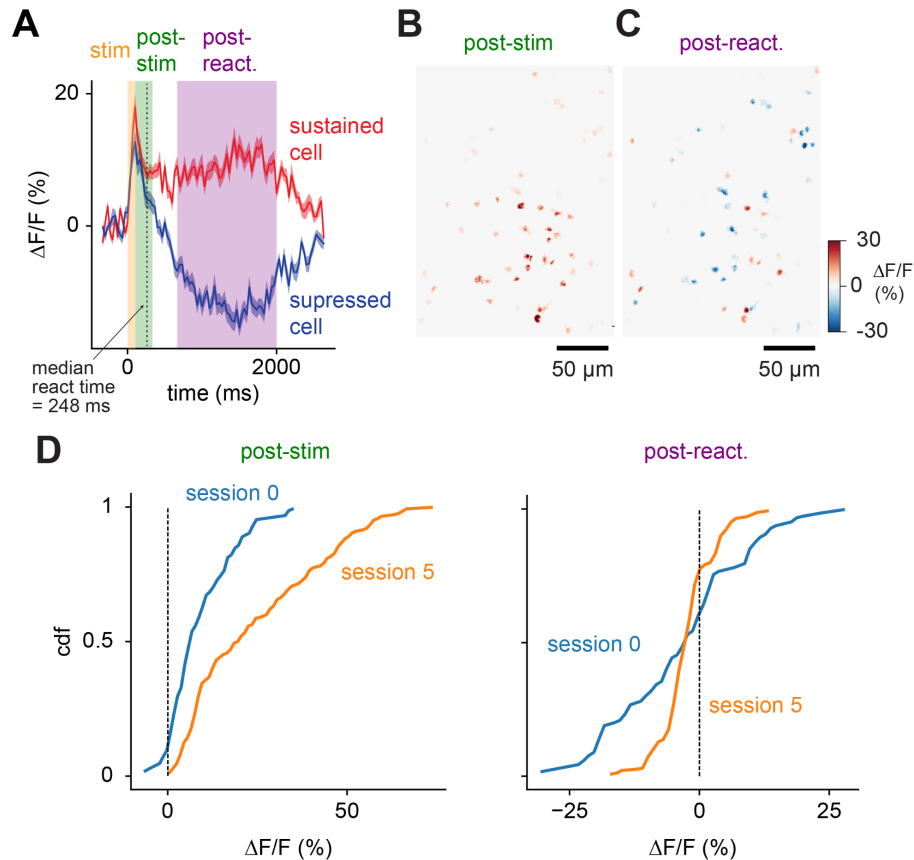

746

747 **Figure S7 - Behaviorally-relevant cell responses show elevated firing rates while post-decision responses**  
748 **show suppression, Related to Figure 2. (A)** Population timecourses of response for cells that show a positive or  
749 negative response during the post-react period (sustained and suppressed, respectively). Analysis periods are  
750 highlighted: stimulation, orange; post-stimulation, green; and post-reaction, purple (see Methods). **(B)**  
751 Spatial distribution of average responses during the post-stim. period shows uniformly positive responses, while **(C)**  
752 distribution of responses during the post-react. period show salt-and-pepper sustained and suppressed responses.  
753 **(D)** Cumulative distributions of responses during the post-stim. period (left) and post-react. Period (right).

754

755

756

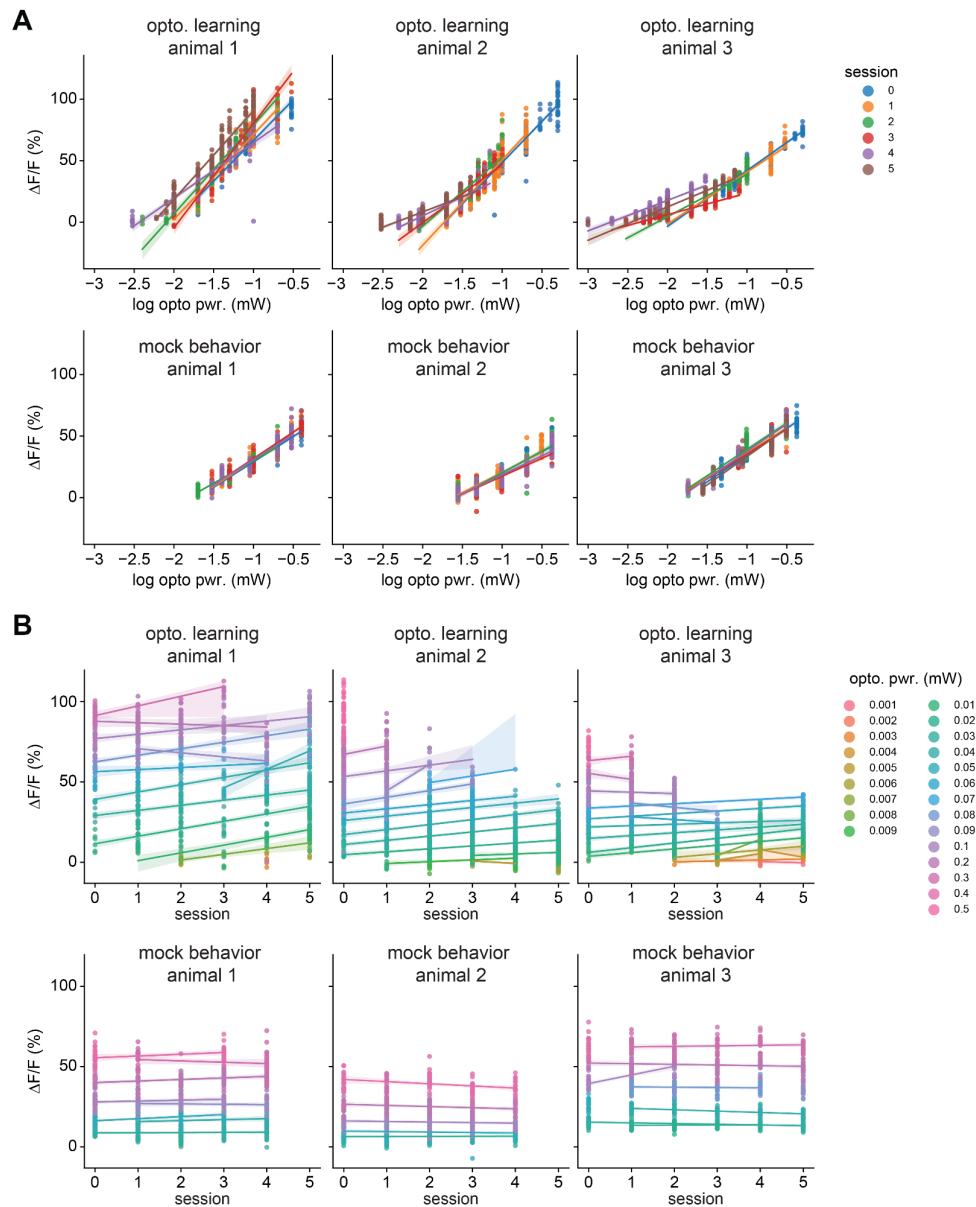

757 **Figure S8 - V1 amplification effect, all sessions, all animals, Related to Figure 2.** (A) Linear regression model for  
 758 testing for amplification effects between behavioral sessions (ROI-based population analysis shown in Figure 2C-J).  
 759 OLS regression using all trials the stimulus was successfully detected (optogenetic learning animals:  $p = 1.73 \times 10^{-12}$ ,  
 760  $N = 3$  animals, 2633 trials; mock behavioral control animals:  $p = 0.26$ ,  $N = 3$ , 1731 trials model:  $\Delta F/F \sim C(\text{animal}) * C(\text{session}) + \text{stimulation\_power\_mw} + \text{trial\_number} + \text{constant}$ , where  $C(x)$  signifies a categorical or dummy  
 761 variable). Treating power as a continuous variable did not change the results. In the three training animals, lines fit on  
 762 each session (colors) moved leftward as learning progressed, signifying amplification. Within each session we found  
 763 a small decrease in responses to stimulation (average  $\Delta F/F$  change over 100 trials:  $-1.2\% \Delta F/F$ , 95% CI  $[-0.9$  to  
 764  $1.6]\% \Delta F/F$ , coeff. less than zero at  $p < 10^{-13}$ , via linear regression over trials within day, estimated across animals  
 765 and sessions,  $N = 3$ ; Methods) (B) Comparison of amplification at each power across all behavioral sessions. Here,  
 766 at many powers common across sessions (colors, lines), the slope of the corresponding line was positive, signifying  
 767 amplification. We found a small decrease in responses to stimulation over the course of each experimental day.  
 768

769

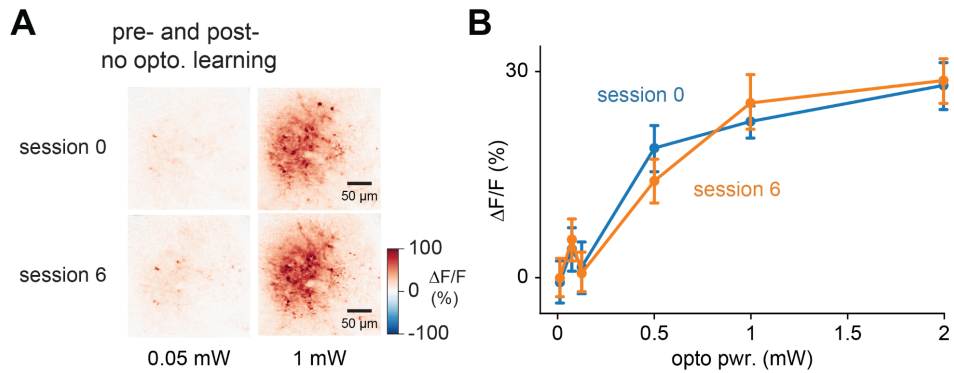

770

771 **Figure S9 - No amplification occurs for optogenetic stimulation delivered to V1 outside the learning context,**  
772 **Related to Figure 2. (A)** Mean  $\Delta F/F$  responses in an example animal to 0.05 and 1 mW of optogenetic stimulation  
773 delivered outside the behavioral context; animal was awake and alert but any motor responses were not reinforced  
774 (see Methods). 0.05 mW is near the average post-learning threshold power for optogenetic learning animals. 1 mW is  
775 a power level three times higher than the maximum used in training optogenetic learning animals. **(B)** No  
776 amplification occurs at any power level over seven sessions of optogenetic stimulation (example animal, session 0,  
777 blue, to session 6, orange, mean  $\pm$  SEM). There was no significant change in response across N = 2 animals  
778 (session 0 vs. 6, via ANOVA/linear regression;  $t = 1.1$ ,  $p = 0.27$ , also neither animal reaches significance alone, and  
779 treating power as a continuous or log-continuous variable did not change the results; see Methods for regression  
780 details).

781

782

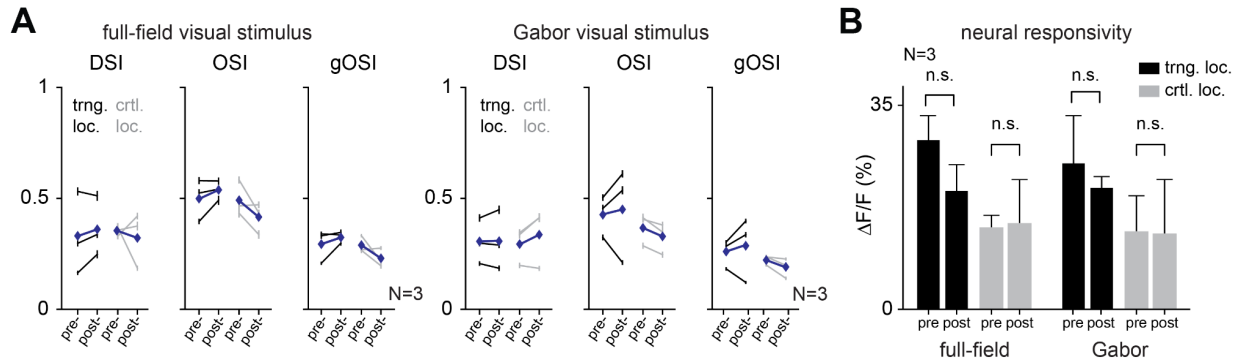

783

784 **Figure S10 - Visual response changes and neural responsivity before and after optogenetic learning, Related**  
785 **to Figure 3. (A)** Visual response changes, pre- and post-learning, for individual animals. Cohort means shown by  
786 blue diamonds (mean ± SEM, N = 3). **(B)** Mean neural responsivity reveals no significant pre- versus post-learning  
787 changes at either the optogenetic training or control locations (mean ± SEM, N = 3).



788

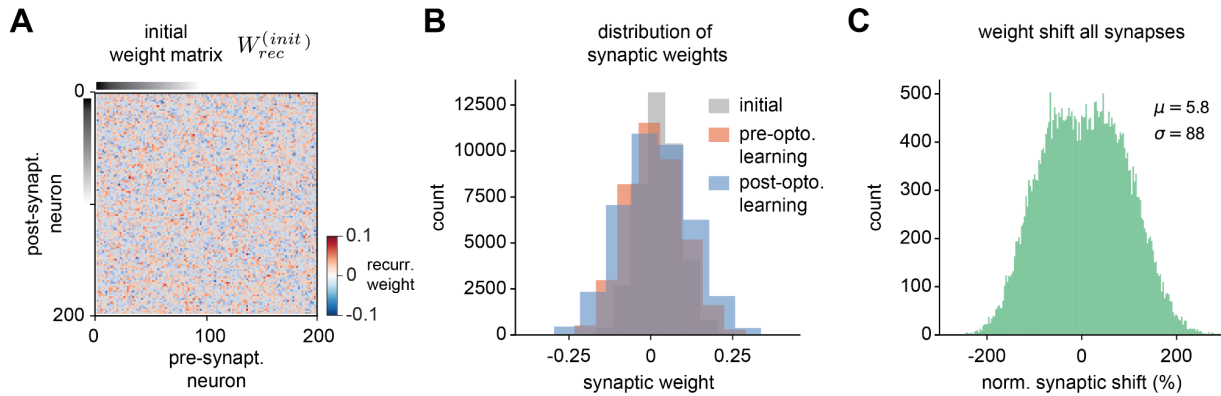

789

790 **Figure S11 - Synaptic weight matrix for initial configuration, and overall distributions of synaptic weights**  
791 **before and after training, Related to Figure 4.** (A) Initial weight matrix before any training. Sampled from a random  
792 Gaussian distribution with mean zero (see Methods). (B) Distributions of synaptic weights, initial (gray), pre-opto.  
793 learning (red), and after training to amplify outputs (post-opto. learning, blue). (C) Distribution of synaptic weight  
794 changes (pre-opto. versus post-opto. learning), across all synapses, normalized to the mean pre-training weight.

795

## 796 **References**

- 797 1. Chung, S., and Abbott, L.F. (2021). Neural population geometry: An approach for  
798 understanding biological and artificial neural networks. *Curr. Opin. Neurobiol.* *70*, 137–144.  
799 10.1016/j.conb.2021.10.010.
- 800 2. Gold, J.I., and Shadlen, M.N. (2007). The neural basis of decision making. *Annu. Rev.*  
801 *Neurosci.* *30*, 535–574. 10.1146/annurev.neuro.29.051605.113038.
- 802 3. Wang, X.-J. (2012). Neural dynamics and circuit mechanisms of decision-making. *Curr.*  
803 *Opin. Neurobiol.* *22*, 1039–1046. 10.1016/j.conb.2012.08.006.
- 804 4. Niell, C.M., and Scanziani, M. (2021). How Cortical Circuits Implement Cortical  
805 Computations: Mouse Visual Cortex as a Model. *Annu. Rev. Neurosci.* *44*, 517–546.  
806 10.1146/annurev-neuro-102320-085825.
- 807 5. Wu, Z., Litwin-Kumar, A., Shamash, P., Taylor, A., Axel, R., and Shadlen, M.N. (2020).  
808 Context-Dependent Decision Making in a Premotor Circuit. *Neuron* *106*, 316–328.e6.  
809 10.1016/j.neuron.2020.01.034.
- 810 6. Egger, S.W., and Lisberger, S.G. (2022). Neural structure of a sensory decoder for motor  
811 control. *Nat. Commun.* *13*, 1829. 10.1038/s41467-022-29457-4.
- 812 7. Hengen, K.B., Lambo, M.E., Van Hooser, S.D., Katz, D.B., and Turrigiano, G.G. (2013).  
813 Firing rate homeostasis in visual cortex of freely behaving rodents. *Neuron* *80*, 335–342.  
814 10.1016/j.neuron.2013.08.038.
- 815 8. Malenka, R.C., and Bear, M.F. (2004). LTP and LTD: an embarrassment of riches. *Neuron*  
816 *44*, 5–21. 10.1016/j.neuron.2004.09.012.
- 817 9. He, H.-Y., Hodos, W., and Quinlan, E.M. (2006). Visual deprivation reactivates rapid ocular  
818 dominance plasticity in adult visual cortex. *J. Neurosci.* *26*, 2951–2955.  
819 10.1523/JNEUROSCI.5554-05.2006.
- 820 10. Sawtell, N.B., Frenkel, M.Y., Philpot, B.D., Nakazawa, K., Tonegawa, S., and Bear, M.F.  
821 (2003). NMDA receptor-dependent ocular dominance plasticity in adult visual cortex.  
822 *Neuron* *38*, 977–985. 10.1016/s0896-6273(03)00323-4.
- 823 11. Frégnac, Y., and Shulz, D.E. (1999). Activity-dependent regulation of receptive field  
824 properties of cat area 17 by supervised Hebbian learning. *J. Neurobiol.* *41*, 69–82.  
825 10.1002/(sici)1097-4695(199910)41:1<69::aid-neu10>3.0.co;2-1.
- 826 12. Schoups, A., Vogels, R., Qian, N., and Orban, G. (2001). Practising orientation  
827 identification improves orientation coding in V1 neurons. *Nature* *412*, 549–553.  
828 10.1038/35087601.
- 829 13. Schwartz, S., Maquet, P., and Frith, C. (2002). Neural correlates of perceptual learning: a  
830 functional MRI study of visual texture discrimination. *Proc. Natl. Acad. Sci. U. S. A.* *99*,  
831 17137–17142. 10.1073/pnas.242414599.
- 832 14. Li, W., Piëch, V., and Gilbert, C.D. (2008). Learning to link visual contours. *Neuron* *57*,  
833 442–451. 10.1016/j.neuron.2007.12.011.

- 834 15. Bao, M., Yang, L., Rios, C., He, B., and Engel, S.A. (2010). Perceptual learning increases  
835 the strength of the earliest signals in visual cortex. *J. Neurosci.* *30*, 15080–15084.  
836 10.1523/JNEUROSCI.5703-09.2010.
- 837 16. Ghose, G.M., Yang, T., and Maunsell, J.H.R. (2002). Physiological correlates of perceptual  
838 learning in monkey V1 and V2. *J. Neurophysiol.* *87*, 1867–1888. 10.1152/jn.00690.2001.
- 839 17. Goltstein, P.M., Coffey, E.B.J., Roelfsema, P.R., and Pennartz, C.M.A. (2013). In vivo two-  
840 photon Ca<sup>2+</sup> imaging reveals selective reward effects on stimulus-specific assemblies in  
841 mouse visual cortex. *J. Neurosci.* *33*, 11540–11555. 10.1523/JNEUROSCI.1341-12.2013.
- 842 18. Poort, J., Khan, A.G., Pachitariu, M., Nemri, A., Orsolich, I., Krupic, J., Bauza, M., Sahani,  
843 M., Keller, G.B., Mrsic-Flogel, T.D., et al. (2015). Learning Enhances Sensory and Multiple  
844 Non-sensory Representations in Primary Visual Cortex. *Neuron* *86*, 1478–1490.  
845 10.1016/j.neuron.2015.05.037.
- 846 19. Goltstein, P.M., Reinert, S., Bonhoeffer, T., and Hübener, M. (2021). Mouse visual cortex  
847 areas represent perceptual and semantic features of learned visual categories. *Nat.*  
848 *Neurosci.* *24*, 1441–1451. 10.1038/s41593-021-00914-5.
- 849 20. Yotsumoto, Y., Watanabe, T., and Sasaki, Y. (2008). Different dynamics of performance  
850 and brain activation in the time course of perceptual learning. *Neuron* *57*, 827–833.  
851 10.1016/j.neuron.2008.02.034.
- 852 21. Jurjut, O., Georgieva, P., Busse, L., and Katzner, S. (2017). Learning Enhances Sensory  
853 Processing in Mouse V1 before Improving Behavior. *J. Neurosci.* *37*, 6460–6474.  
854 10.1523/JNEUROSCI.3485-16.2017.
- 855 22. Marshel, J.H., Kim, Y.S., Machado, T.A., Quirin, S., Benson, B., Kadmon, J., Raja, C.,  
856 Chibukhchyan, A., Ramakrishnan, C., Inoue, M., et al. (2019). Cortical layer-specific critical  
857 dynamics triggering perception. *Science* *365*. 10.1126/science.aaw5202.
- 858 23. Henschke, J.U., Dylida, E., Katsanevaki, D., Dupuy, N., Currie, S.P., Amvrosiadis, T.,  
859 Pakan, J.M.P., and Rochefort, N.L. (2020). Reward Association Enhances Stimulus-  
860 Specific Representations in Primary Visual Cortex. *Curr. Biol.* *30*, 1866–1880.e5.  
861 10.1016/j.cub.2020.03.018.
- 862 24. Khan, A.G., Poort, J., Chadwick, A., Blot, A., Sahani, M., Mrsic-Flogel, T.D., and Hofer, S.B.  
863 (2018). Distinct learning-induced changes in stimulus selectivity and interactions of  
864 GABAergic interneuron classes in visual cortex. *Nat. Neurosci.* *21*, 851–859.  
865 10.1038/s41593-018-0143-z.
- 866 25. Boynton, G.M., and Finney, E.M. (2003). Orientation-Specific Adaptation in Human Visual  
867 Cortex. *J. Neurosci.* *23*, 8781–8787. 10.1523/jneurosci.23-25-08781.2003.
- 868 26. Yang, T., and Maunsell, J.H.R. (2004). The effect of perceptual learning on neuronal  
869 responses in monkey visual area V4. *J. Neurosci.* *24*, 1617–1626.  
870 10.1523/JNEUROSCI.4442-03.2004.
- 871 27. Doshier, B., and Lu, Z.-L. (2017). Visual Perceptual Learning and Models. *Annu. Rev. Vis.*  
872 *Sci.* *3*, 343–363. 10.1146/annurev-vision-102016-061249.

- 873 28. Schmolesky, M.T., Wang, Y., Hanes, D.P., Thompson, K.G., Leutgeb, S., Schall, J.D., and  
874 Leventhal, A.G. (1998). Signal timing across the macaque visual system. *J. Neurophysiol.*  
875 *79*, 3272–3278. [10.1152/jn.1998.79.6.3272](https://doi.org/10.1152/jn.1998.79.6.3272).
- 876 29. Steinmetz, N.A., Zatka-Haas, P., Carandini, M., and Harris, K.D. (2019). Distributed coding  
877 of choice, action and engagement across the mouse brain. *Nature* *576*, 266–273.  
878 [10.1038/s41586-019-1787-x](https://doi.org/10.1038/s41586-019-1787-x).
- 879 30. Zatka-Haas, P., Steinmetz, N.A., Carandini, M., and Harris, K.D. (2021). Sensory coding  
880 and the causal impact of mouse cortex in a visual decision. *eLife* *10*. [10.7554/eLife.63163](https://doi.org/10.7554/eLife.63163).
- 881 31. Liang, L., Fratzl, A., Reggiani, J.D.S., El Mansour, O., Chen, C., and Andermann, M.L.  
882 (2020). Retinal Inputs to the Thalamus Are Selectively Gated by Arousal. *Curr. Biol.* *30*,  
883 3923–3934.e9. [10.1016/j.cub.2020.07.065](https://doi.org/10.1016/j.cub.2020.07.065).
- 884 32. Jazayeri, M., and Afraz, A. (2017). Navigating the Neural Space in Search of the Neural  
885 Code. *Neuron* *93*, 1003–1014. [10.1016/j.neuron.2017.02.019](https://doi.org/10.1016/j.neuron.2017.02.019).
- 886 33. Sadtler, P.T., Quick, K.M., Golub, M.D., Chase, S.M., Ryu, S.I., Tyler-Kabara, E.C., Yu,  
887 B.M., and Batista, A.P. (2014). Neural constraints on learning. *Nature* *512*, 423–426.  
888 [10.1038/nature13665](https://doi.org/10.1038/nature13665).
- 889 34. Murphy, B.K., and Miller, K.D. (2009). Balanced amplification: a new mechanism of  
890 selective amplification of neural activity patterns. *Neuron* *61*, 635–648.  
891 [10.1016/j.neuron.2009.02.005](https://doi.org/10.1016/j.neuron.2009.02.005).
- 892 35. Goldman, M.S. (2009). Memory without feedback in a neural network. *Neuron* *61*, 621–634.  
893 [10.1016/j.neuron.2008.12.012](https://doi.org/10.1016/j.neuron.2008.12.012).
- 894 36. Hennequin, G., Vogels, T.P., and Gerstner, W. (2012). Non-normal amplification in random  
895 balanced neuronal networks. *Phys. Rev. E Stat. Nonlin. Soft Matter Phys.* *86*, 011909.  
896 [10.1103/PhysRevE.86.011909](https://doi.org/10.1103/PhysRevE.86.011909).
- 897 37. Pégard, N.C., Mardinly, A.R., Oldenburg, I.A., Sridharan, S., Waller, L., and Adesnik, H.  
898 (2017). Three-dimensional scanless holographic optogenetics with temporal focusing (3D-  
899 SHOT). *Nature Communications* *8*. [10.1038/s41467-017-01031-3](https://doi.org/10.1038/s41467-017-01031-3).
- 900 38. Cardin, J.A., Carlén, M., Meletis, K., Knoblich, U., Zhang, F., Deisseroth, K., Tsai, L.-H.,  
901 and Moore, C.I. (2010). Targeted optogenetic stimulation and recording of neurons in vivo  
902 using cell-type-specific expression of Channelrhodopsin-2. *Nat. Protocols* *5*, 247–254.  
903 [10.1038/nprot.2009.228](https://doi.org/10.1038/nprot.2009.228).
- 904 39. Sohal, D.S., Nghiem, M., Crackower, M.A., Witt, S.A., Kimball, T.R., Tymitz, K.M.,  
905 Penninger, J.M., and Molkentin, J.D. (2001). Temporally regulated and tissue-specific gene  
906 manipulations in the adult and embryonic heart using a tamoxifen-inducible Cre protein.  
907 *Circ. Res.* *89*, 20–25. [10.1161/hh1301.092687](https://doi.org/10.1161/hh1301.092687).
- 908 40. Dana, H., Sun, Y., Mohar, B., Hulse, B.K., Kerlin, A.M., Hasseman, J.P., Tsegaye, G.,  
909 Tsang, A., Wong, A., Patel, R., et al. (2019). High-performance calcium sensors for imaging  
910 activity in neuronal populations and microcompartments. *Nat. Methods* *16*, 649–657.  
911 [10.1038/s41592-019-0435-6](https://doi.org/10.1038/s41592-019-0435-6).

- 912 41. Kügler, S., Kilic, E., and Bähr, M. (2003). Human synapsin 1 gene promoter confers highly  
913 neuron-specific long-term transgene expression from an adenoviral vector in the adult rat  
914 brain depending on the transduced area. *Gene Therapy* 10, 337–347.  
915 10.1038/sj.gt.3301905.
- 916 42. Zhang, Y., Rózsa, M., Bushey, D., Zheng, J., Reep, D., Broussard, G.J., Tsang, A.,  
917 Tsegaye, G., Patel, R., Narayan, S., et al. (2020). jGCaMP8 fast genetically encoded  
918 calcium indicators. *Janelia Research Campus* 10, 13148243.
- 919 43. Histed, M.H., and Maunsell, J.H.R. (2014). Cortical neural populations can guide behavior  
920 by integrating inputs linearly, independent of synchrony. *Proc. Natl. Acad. Sci. U. S. A.* 111,  
921 E178–E187. 10.1073/pnas.1318750111.
- 922 44. Macmillan, N.A., and Douglas Creelman, C. (2005). *Detection Theory: A User's Guide*  
923 (Lawrence Erlbaum Associates).
- 924 45. Dalgleish, H.W., Russell, L.E., Packer, A.M., Roth, A., Gauld, O.M., Greenstreet, F.,  
925 Thompson, E.J., and Häusser, M. (2020). How many neurons are sufficient for perception  
926 of cortical activity? *eLife* 9. 10.7554/eLife.58889.
- 927 46. O'Rawe, J.F., Zhou, Z., Li, A.J., LaFosse, P.K., Goldbach, H.C., and Histed, M.H. (2022).  
928 Excitation creates a distributed pattern of cortical suppression due to varied recurrent input.  
929 *bioRxiv*, 2022.08.31.505844. 10.1101/2022.08.31.505844.
- 930 47. Brunel, N. (2000). Dynamics of sparsely connected networks of excitatory and inhibitory  
931 spiking neurons. *J. Comput. Neurosci.* 8, 183–208. 10.1023/a:1008925309027.
- 932 48. Sanzeni, A., Histed, M.H., and Brunel, N. (2022). Emergence of Irregular Activity in  
933 Networks of Strongly Coupled Conductance-Based Neurons. *Phys. Rev. X* 12, 011044.  
934 10.1103/PhysRevX.12.011044.
- 935 49. Ahmadian, Y., and Miller, K.D. (2021). What is the dynamical regime of cerebral cortex?  
936 *Neuron* 109, 3373–3391. 10.1016/j.neuron.2021.07.031.
- 937 50. Sanzeni, A., Akitake, B., Goldbach, H.C., Leedy, C.E., Brunel, N., and Histed, M.H. (2020).  
938 Inhibition stabilization is a widespread property of cortical networks. *eLife* 9.  
939 10.7554/elife.54875.
- 940 51. Destexhe, A., and Paré, D. (1999). Impact of network activity on the integrative properties  
941 of neocortical pyramidal neurons in vivo. *J. Neurophysiol.* 81, 1531–1547.  
942 10.1152/jn.1999.81.4.1531.
- 943 52. Mainen, Z.F., and Sejnowski, T.J. (1995). Reliability of spike timing in neocortical neurons.  
944 *Science* 268, 1503–1506. 10.1126/science.7770778.
- 945 53. Friedrich, J., Zhou, P., and Paninski, L. (2017). Fast online deconvolution of calcium  
946 imaging data. *PLoS Comput. Biol.* 13, e1005423. 10.1371/journal.pcbi.1005423.
- 947 54. Stern, M., Shea-Brown, E., and Witten, D. (2020). Inferring the Spiking Rate of a Population  
948 of Neurons from Wide-Field Calcium Imaging. *bioRxiv*, 2020.02.01.930040.  
949 10.1101/2020.02.01.930040.
- 950 55. Pachitariu, M., Stringer, C., Dipoppa, M., Schröder, S., Federico Rossi, L., Dalgleish, H.,

- 951 Carandini, M., and Harris, K.D. (2017). Suite2p: beyond 10,000 neurons with standard two-  
952 photon microscopy. *bioRxiv*, 061507. 10.1101/061507.
- 953 56. Hubel, D.H., and Wiesel, T.N. (1962). Receptive fields, binocular interaction and functional  
954 architecture in the cat's visual cortex. *J. Physiol.* 160, 106–154.  
955 10.1113/jphysiol.1962.sp006837.
- 956 57. Cano, M., Bezdudnaya, T., Swadlow, H.A., and Alonso, J.-M. (2006). Brain state and  
957 contrast sensitivity in the awake visual thalamus. *Nat. Neurosci.* 9, 1240–1242.  
958 10.1038/nn1760.
- 959 58. Sadagopan, S., and Ferster, D. (2012). Feedforward origins of response variability  
960 underlying contrast invariant orientation tuning in cat visual cortex. *Neuron* 74, 911–923.  
961 10.1016/j.neuron.2012.05.007.
- 962 59. Kelly, S.T., Kremkow, J., Jin, J., Wang, Y., Wang, Q., Alonso, J.-M., and Stanley, G.B.  
963 (2014). The role of thalamic population synchrony in the emergence of cortical feature  
964 selectivity. *PLoS Comput. Biol.* 10, e1003418. 10.1371/journal.pcbi.1003418.
- 965 60. Deitch, D., Rubin, A., and Ziv, Y. (2021). Representational drift in the mouse visual cortex.  
966 *Curr. Biol.* 31, 4327–4339.e6. 10.1016/j.cub.2021.07.062.
- 967 61. Marks, T.D., and Goard, M.J. (2021). Stimulus-dependent representational drift in primary  
968 visual cortex. *Nat. Commun.* 12, 5169. 10.1038/s41467-021-25436-3.
- 969 62. Moreno-Bote, R., Beck, J., Kanitscheider, I., Pitkow, X., Latham, P., and Pouget, A. (2014).  
970 Information-limiting correlations. *Nat. Neurosci.* 17, 1410–1417. 10.1038/nn.3807.
- 971 63. Pancholi, R., Ryan, L., and Peron, S. (2021). Sensory cortical dynamics during optical  
972 microstimulation training. *bioRxiv*, 2021.12.17.473191. 10.1101/2021.12.17.473191.
- 973 64. Gill, J.V., Lerman, G.M., Zhao, H., Stetler, B.J., Rinberg, D., and Shoham, S. (2020).  
974 Precise Holographic Manipulation of Olfactory Circuits Reveals Coding Features  
975 Determining Perceptual Detection. *Neuron* 108, 382–393.e5.  
976 10.1016/j.neuron.2020.07.034.
- 977 65. Histed, M.H., Bonin, V., and Reid, R.C. (2009). Direct activation of sparse, distributed  
978 populations of cortical neurons by electrical microstimulation. *Neuron* 63, 508–522.  
979 10.1016/j.neuron.2009.07.016.
- 980 66. Histed, M.H., Ni, A.M., and Maunsell, J.H.R. (2013). Insights into cortical mechanisms of  
981 behavior from microstimulation experiments. *Prog. Neurobiol.* 103, 115–130.  
982 10.1016/j.pneurobio.2012.01.006.
- 983 67. Ni, A.M., and Maunsell, J.H.R. (2010). Microstimulation reveals limits in detecting different  
984 signals from a local cortical region. *Curr. Biol.* 20, 824–828. 10.1016/j.cub.2010.02.065.
- 985 68. Doty, R.W. (1969). Electrical stimulation of the brain in behavioral context. *Annu. Rev.*  
986 *Psychol.* 20, 289–320. 10.1146/annurev.ps.20.020169.001445.
- 987 69. Doron, G., and Brecht, M. (2015). What single-cell stimulation has told us about neural  
988 coding. *Philos. Trans. R. Soc. Lond. B Biol. Sci.* 370, 20140204. 10.1098/rstb.2014.0204.

- 989 70. Luis-Islas, J., Luna, M., Floran, B., and Gutierrez, R. (2022). Optoception: Perception of  
990 Optogenetic Brain Perturbations. *eNeuro* 9. 10.1523/ENEURO.0216-22.2022.
- 991 71. Kohn, A., Coen-Cagli, R., Kanitscheider, I., and Pouget, A. (2016). Correlations and  
992 Neuronal Population Information. *Annu. Rev. Neurosci.* 10.1146/annurev-neuro-070815-  
993 013851.
- 994 72. Brashers-Krug, T., Shadmehr, R., and Bizzi, E. (1996). Consolidation in human motor  
995 memory. *Nature* 382, 252–255. 10.1038/382252a0.
- 996 73. Krakauer, J.W., and Shadmehr, R. (2006). Consolidation of motor memory. *Trends*  
997 *Neurosci.* 29, 58–64. 10.1016/j.tins.2005.10.003.
- 998 74. Pons, T.P., Garraghty, P.E., Ommaya, A.K., Kaas, J.H., Taub, E., and Mishkin, M. (1991).  
999 Massive cortical reorganization after sensory deafferentation in adult macaques. *Science*  
1000 252, 1857–1860. 10.1126/science.1843843.
- 1001 75. Gilbert, C.D., and Li, W. (2012). Adult visual cortical plasticity. *Neuron* 75, 250–264.  
1002 10.1016/j.neuron.2012.06.030.
- 1003 76. Alejandro-García, T., Kim, S., Pérez-Ortega, J., and Yuste, R. (2022). Intrinsic excitability  
1004 mechanisms of neuronal ensemble formation. *Elife* 11. 10.7554/eLife.77470.
- 1005 77. Sadeh, S., and Clopath, C. (2020). Theory of neuronal perturbome in cortical networks.  
1006 *Proc. Natl. Acad. Sci. U. S. A.* 117, 26966–26976. 10.1073/pnas.2004568117.
- 1007 78. Carrillo-Reid, L., and Yuste, R. (2020). Playing the piano with the cortex: role of neuronal  
1008 ensembles and pattern completion in perception and behavior. *Curr. Opin. Neurobiol.* 64,  
1009 89–95. 10.1016/j.conb.2020.03.014.
- 1010 79. Peters, A.J., Liu, H., and Komiyama, T. (2017). Learning in the Rodent Motor Cortex. *Annu.*  
1011 *Rev. Neurosci.* 40, 77–97. 10.1146/annurev-neuro-072116-031407.
- 1012 80. Hedrick, N.G., Lu, Z., Bushong, E., Singhi, S., Nguyen, P., Magaña, Y., Jilani, S., Lim, B.K.,  
1013 Ellisman, M., and Komiyama, T. (2022). Learning binds new inputs into functional synaptic  
1014 clusters via spinogenesis. *Nature Neuroscience* 25, 726–737. 10.1038/s41593-022-01086-  
1015 6.
- 1016 81. Liu, B., Seay, M.J., and Buonomano, D.V. (2023). Creation of Neuronal Ensembles and  
1017 Cell-Specific Homeostatic Plasticity through Chronic Sparse Optogenetic Stimulation. *J.*  
1018 *Neurosci.* 43, 82–92. 10.1523/JNEUROSCI.1104-22.2022.
- 1019 82. Keck, T., Keller, G.B., Jacobsen, R.I., Eysel, U.T., Bonhoeffer, T., and Hübener, M. (2013).  
1020 Synaptic scaling and homeostatic plasticity in the mouse visual cortex in vivo. *Neuron* 80,  
1021 327–334. 10.1016/j.neuron.2013.08.018.
- 1022 83. Swanson, O.K., and Maffei, A. (2019). From Hiring to Firing: Activation of Inhibitory  
1023 Neurons and Their Recruitment in Behavior. *Front. Mol. Neurosci.* 12, 168.  
1024 10.3389/fnmol.2019.00168.
- 1025 84. Trachtenberg, J.T. (2015). Competition, inhibition, and critical periods of cortical plasticity.  
1026 *Curr. Opin. Neurobiol.* 35, 44–48. 10.1016/j.conb.2015.06.006.

- 1027 85. Heimel, J.A., van Versendaal, D., and Levelt, C.N. (2011). The role of GABAergic inhibition  
1028 in ocular dominance plasticity. *Neural Plast.* 2011, 391763. 10.1155/2011/391763.
- 1029 86. Fagiolini, M., and Hensch, T.K. (2000). Inhibitory threshold for critical-period activation in  
1030 primary visual cortex. *Nature* 404, 183–186. 10.1038/35004582.
- 1031 87. Fagiolini, M., Fritschy, J.-M., Löw, K., Möhler, H., Rudolph, U., and Hensch, T.K. (2004).  
1032 Specific GABAA circuits for visual cortical plasticity. *Science* 303, 1681–1683.  
1033 10.1126/science.1091032.
- 1034 88. Carcea, I., and Froemke, R.C. (2013). Chapter 3 - Cortical Plasticity, Excitatory–Inhibitory  
1035 Balance, and Sensory Perception. In *Progress in Brain Research*, M. M. Merzenich, M.  
1036 Nahum, and T. M. Van Vleet, eds. (Elsevier), pp. 65–90. 10.1016/B978-0-444-63327-  
1037 9.00003-5.
- 1038 89. Reichelt, A.C., Hare, D.J., Bussey, T.J., and Saksida, L.M. (2019). Perineuronal Nets:  
1039 Plasticity, Protection, and Therapeutic Potential. *Trends Neurosci.* 42, 458–470.  
1040 10.1016/j.tins.2019.04.003.
- 1041 90. Hylin, M.J., Orsi, S.A., Moore, A.N., and Dash, P.K. (2013). Disruption of the perineuronal  
1042 net in the hippocampus or medial prefrontal cortex impairs fear conditioning. *Learn. Mem.*  
1043 20, 267–273. 10.1101/lm.030197.112.
- 1044 91. Banerjee, S.B., Gutzeit, V.A., Baman, J., Aoued, H.S., Doshi, N.K., Liu, R.C., and Ressler,  
1045 K.J. (2017). Perineuronal Nets in the Adult Sensory Cortex Are Necessary for Fear  
1046 Learning. *Neuron* 95, 169–179.e3. 10.1016/j.neuron.2017.06.007.
- 1047 92. Le Naour, F., Hohenkirk, L., Grolleau, A., Misek, D.E., Lescure, P., Geiger, J.D., Hanash,  
1048 S., and Beretta, L. (2001). Profiling changes in gene expression during differentiation and  
1049 maturation of monocyte-derived dendritic cells using both oligonucleotide microarrays and  
1050 proteomics. *J. Biol. Chem.* 276, 17920–17931. 10.1074/jbc.M100156200.
- 1051 93. Sorg, B.A., Berretta, S., Blacktop, J.M., Fawcett, J.W., Kitagawa, H., Kwok, J.C.F., and  
1052 Miquel, M. (2016). Casting a Wide Net: Role of Perineuronal Nets in Neural Plasticity. *J.*  
1053 *Neurosci.* 36, 11459–11468. 10.1523/JNEUROSCI.2351-16.2016.
- 1054 94. Balmer, T.S., Carels, V.M., Frisch, J.L., and Nick, T.A. (2009). Modulation of perineuronal  
1055 nets and parvalbumin with developmental song learning. *J. Neurosci.* 29, 12878–12885.  
1056 10.1523/JNEUROSCI.2974-09.2009.
- 1057 95. Gu, Y., Tran, T., Murase, S., Borrell, A., Kirkwood, A., and Quinlan, E.M. (2016).  
1058 Neuregulin-dependent regulation of fast-spiking interneuron excitability controls the timing  
1059 of the critical period. *J. Neurosci.* 36, 10285–10295. 10.1523/JNEUROSCI.4242-15.2016.
- 1060 96. Hensch, T.K. (2005). Critical period plasticity in local cortical circuits. *Nat. Rev. Neurosci.* 6,  
1061 877–888. 10.1038/nrn1787.
- 1062 97. Katz, L.C., and Crowley, J.C. (2002). Development of cortical circuits: lessons from ocular  
1063 dominance columns. *Nat. Rev. Neurosci.* 3, 34–42. 10.1038/nrn703.
- 1064 98. Desai, N.S., Cudmore, R.H., Nelson, S.B., and Turrigiano, G.G. (2002). Critical periods for  
1065 experience-dependent synaptic scaling in visual cortex. *Nat. Neurosci.* 5, 783–789.



- 1066 10.1038/nn878.
- 1067 99. Gorski, J.A., Talley, T., Qiu, M., Puellas, L., Rubenstein, J.L.R., and Jones, K.R. (2002).  
1068 Cortical excitatory neurons and glia, but not GABAergic neurons, are produced in the  
1069 Emx1-expressing lineage. *J. Neurosci.* 22, 6309–6314. 20026564.
- 1070 100. Goldbach, H.C., Akitake, B., Leedy, C.E., and Histed, M.H. (2021). Performance in even a  
1071 simple perceptual task depends on mouse secondary visual areas. *eLife* 10.  
1072 10.7554/eLife.62156.
- 1073 101. Histed, M.H., Carvalho, L.A., and Maunsell, J.H.R. (2012). Psychophysical measurement of  
1074 contrast sensitivity in the behaving mouse. *J. Neurophysiol.* 107, 758–765.  
1075 10.1152/jn.00609.2011.
- 1076 102. Macmillan, N.A., and Creelman, C.D. (2004). *Detection theory: A user's guide* (Psychology  
1077 press).
- 1078 103. Kerlin, A., Mohar, B., Flickinger, D., MacLennan, B.J., Dean, M.B., Davis, C., Spruston, N.,  
1079 and Svoboda, K. (2019). Functional clustering of dendritic activity during decision-making.  
1080 *eLife* 8. 10.7554/eLife.46966.
- 1081 104. Giovannucci, A., Friedrich, J., Gunn, P., Kalfon, J., Brown, B.L., Koay, S.A., Taxidis, J.,  
1082 Najafi, F., Gauthier, J.L., Zhou, P., et al. (2019). CalmAn an open source tool for scalable  
1083 calcium imaging data analysis. *eLife* 8. 10.7554/eLife.38173.
- 1084 105. Swindale, N.V. (1998). Orientation tuning curves: empirical description and estimation of  
1085 parameters. *Biol. Cybern.* 78, 45–56. 10.1007/s004220050411.
- 1086 106. Kondo, S., and Ohki, K. (2016). Laminar differences in the orientation selectivity of  
1087 geniculate afferents in mouse primary visual cortex. *Nat. Neurosci.* 19, 316–319.  
1088 10.1038/nn.4215.
- 1089 107. Sompolinsky, H., Crisanti, A., and Sommers, H.J. (1988). Chaos in random neural  
1090 networks. *Phys. Rev. Lett.* 61, 259–262. 10.1103/PhysRevLett.61.259.
- 1091 108. Kingma, D.P., and Ba, J. (2014). Adam: A Method for Stochastic Optimization. arXiv  
1092 [cs.LG].
- 1093 109. Paszke, A., Gross, S., Massa, F., Lerer, A., Bradbury, J., Chanan, G., Killeen, T., Lin, Z.,  
1094 Gimelshein, N., Antiga, L., et al. (2019). PyTorch: An imperative style, high-performance  
1095 deep learning library. arXiv [cs.LG].
- 1096
